# Supplementary material for: Cancer-associated Lactobacillus iners are genetically distinct and associated with chemoradiation resistance in cervical cancer
Source: medRxiv preprint, doi:10.1101/2022.04.26.22274346, version 1 (2022-04-28)
Supplement: Supplemental Table 5 [file 274346_file17.docx]

**Supplemental Table 5. Comparative Analysis Summary Results**

Note: In addition to reflecting differences in biology of different organisms, these statistics will reflect differences in the levels of curation, data availability, and completeness of the PGDBs for these organisms.

Comparative analysis and statistics were computed for the following organism databases:

- *Lactobacillus iners ATCC 55195*
- *Lactobacillus iners I012T4*
- *Lactobacillus iners KY*
- *Lactobacillus iners pt1*
- *Lactobacillus iners pt2*

Metadata of the organisms:

- *L. iners* ATCC 55195 is a draft genome of *L.iners* ATCC 55195 strain isolated form a patient with bacterial vaginosis
- *L. iners* I012T4 is the high quality draft genome of *L.iners* assembled from WGS sequencing data of a cervical swab of CC patient.
- *L. iners* KY is the complete genome of *L.iners* isolatedfrom a healthy individual
- *L. iners* pt1 and *L.iners* pt2 are draft genomes of *L.iners*  isolated from cervical swabs of 2 CC patients

**Table of Contents**

- **Organism**
  - Supplemental Table 5A: Database Summary Statistics
- **Reactions**
  - Supplemental Table 5B: Breakdown of Reactions by Type
  - Supplemental Table 5C: Reactions of Small Molecule Metabolism
  - Supplemental Table 5D: Breakdown of SMM Reactions by Top-Level EC Category
  - Supplemental Table 5E: Shared Reactions
  - Supplemental Table 5F: Unique Reactions
- **Pathways**
  - Supplemental Table 5G: Breakdown of Pathways by Pathway Class
  - Supplemental Table 5H: Shared Pathways
  - Supplemental Table 5I: Unique Pathways
  - Supplemental Table 5J: Pathway Holes
  - Supplemental Table 5K. Pathways involved in degradation of carbohydrate in studied *L. iners* strains
  - Supplemental Table 5L: Cross-Species Comparison of lactose and galactose degradation I

**Organism**

**Supplemental Table 5A: Database Summary Statistics**

| Database | [*L.iners* ATCC 55195](http://localhost:1555/IN55195/organism-summary) | [*L.iners* I012T4](http://localhost:1555/I012T4/organism-summary) | [*L.iners* KY](http://localhost:1555/INKY1/organism-summary) | [*L.iners* pt1](http://localhost:1555/IN366/organism-summary) | [*L.iners* pt2](http://localhost:1555/IN370/organism-summary) |
| --- | --- | --- | --- | --- | --- |
| [Genome Size (bp)](http://localhost:1555/comp-genomics?type=(ORGANISM-STATS+GENOME-SIZE)&orgids=(IN55195+I012T4+INKY1+IN366+IN370)) | 1,217,911 | 1,211,893 | 1,339,101 | 1,292,390 | 1,191,294 |
| [Chromosomes](http://localhost:1555/comp-genomics?type=(ORGANISM-STATS+CHROMOSOMES)&orgids=(IN55195+I012T4+INKY1+IN366+IN370)) | [0](http://localhost:1555/comp-genomics?type=(ORGANISM-STATS+CHROMOSOMES)&orgids=IN55195) | [0](http://localhost:1555/comp-genomics?type=(ORGANISM-STATS+CHROMOSOMES)&orgids=I012T4) | [1](http://localhost:1555/comp-genomics?type=(ORGANISM-STATS+CHROMOSOMES)&orgids=INKY1) | [0](http://localhost:1555/comp-genomics?type=(ORGANISM-STATS+CHROMOSOMES)&orgids=IN366) | [0](http://localhost:1555/comp-genomics?type=(ORGANISM-STATS+CHROMOSOMES)&orgids=IN370) |
| [Organelle Chromosomes](http://localhost:1555/comp-genomics?type=(ORGANISM-STATS+ORGANELLE-CHROMOSOMES)&orgids=(IN55195+I012T4+INKY1+IN366+IN370)) | [0](http://localhost:1555/comp-genomics?type=(ORGANISM-STATS+ORGANELLE-CHROMOSOMES)&orgids=IN55195) | [0](http://localhost:1555/comp-genomics?type=(ORGANISM-STATS+ORGANELLE-CHROMOSOMES)&orgids=I012T4) | [0](http://localhost:1555/comp-genomics?type=(ORGANISM-STATS+ORGANELLE-CHROMOSOMES)&orgids=INKY1) | [0](http://localhost:1555/comp-genomics?type=(ORGANISM-STATS+ORGANELLE-CHROMOSOMES)&orgids=IN366) | [0](http://localhost:1555/comp-genomics?type=(ORGANISM-STATS+ORGANELLE-CHROMOSOMES)&orgids=IN370) |
| [Plasmids](http://localhost:1555/comp-genomics?type=(ORGANISM-STATS+PLASMIDS)&orgids=(IN55195+I012T4+INKY1+IN366+IN370)) | [0](http://localhost:1555/comp-genomics?type=(ORGANISM-STATS+PLASMIDS)&orgids=IN55195) | [0](http://localhost:1555/comp-genomics?type=(ORGANISM-STATS+PLASMIDS)&orgids=I012T4) | [0](http://localhost:1555/comp-genomics?type=(ORGANISM-STATS+PLASMIDS)&orgids=INKY1) | [0](http://localhost:1555/comp-genomics?type=(ORGANISM-STATS+PLASMIDS)&orgids=IN366) | [0](http://localhost:1555/comp-genomics?type=(ORGANISM-STATS+PLASMIDS)&orgids=IN370) |
| [Contigs](http://localhost:1555/comp-genomics?type=(ORGANISM-STATS+CONTIGS)&orgids=(IN55195+I012T4+INKY1+IN366+IN370)) | [27](http://localhost:1555/comp-genomics?type=(ORGANISM-STATS+CONTIGS)&orgids=IN55195) | [14](http://localhost:1555/comp-genomics?type=(ORGANISM-STATS+CONTIGS)&orgids=I012T4) | [0](http://localhost:1555/comp-genomics?type=(ORGANISM-STATS+CONTIGS)&orgids=INKY1) | [28](http://localhost:1555/comp-genomics?type=(ORGANISM-STATS+CONTIGS)&orgids=IN366) | [29](http://localhost:1555/comp-genomics?type=(ORGANISM-STATS+CONTIGS)&orgids=IN370) |
| [Genes](http://localhost:1555/comp-genomics?type=(ORGANISM-STATS+GENES)&orgids=(IN55195+I012T4+INKY1+IN366+IN370)) | [1,189](http://localhost:1555/comp-genomics?type=(ORGANISM-STATS+GENES)&orgids=IN55195) | [1,183](http://localhost:1555/comp-genomics?type=(ORGANISM-STATS+GENES)&orgids=I012T4) | [1,439](http://localhost:1555/comp-genomics?type=(ORGANISM-STATS+GENES)&orgids=INKY1) | [1,275](http://localhost:1555/comp-genomics?type=(ORGANISM-STATS+GENES)&orgids=IN366) | [1,180](http://localhost:1555/comp-genomics?type=(ORGANISM-STATS+GENES)&orgids=IN370) |
| [Genes of known or predicted molecular function](http://localhost:1555/comp-genomics?type=(ORGANISM-STATS+CURATED-GENES)&orgids=(IN55195+I012T4+INKY1+IN366+IN370)" \t "_blank) | [420](http://localhost:1555/comp-genomics?type=(ORGANISM-STATS+CURATED-GENES)&orgids=IN55195) | [510](http://localhost:1555/comp-genomics?type=(ORGANISM-STATS+CURATED-GENES)&orgids=I012T4) | [400](http://localhost:1555/comp-genomics?type=(ORGANISM-STATS+CURATED-GENES)&orgids=INKY1) | [432](http://localhost:1555/comp-genomics?type=(ORGANISM-STATS+CURATED-GENES)&orgids=IN366) | [383](http://localhost:1555/comp-genomics?type=(ORGANISM-STATS+CURATED-GENES)&orgids=IN370) |
| [Genes with experimental evidence](http://localhost:1555/comp-genomics?type=(ORGANISM-STATS+GENES-WITH-EXP-EVIDENCE)&orgids=(IN55195+I012T4+INKY1+IN366+IN370)" \t "_blank) | [0](http://localhost:1555/comp-genomics?type=(ORGANISM-STATS+GENES-WITH-EXP-EVIDENCE)&orgids=IN55195) | [0](http://localhost:1555/comp-genomics?type=(ORGANISM-STATS+GENES-WITH-EXP-EVIDENCE)&orgids=I012T4) | [0](http://localhost:1555/comp-genomics?type=(ORGANISM-STATS+GENES-WITH-EXP-EVIDENCE)&orgids=INKY1) | [0](http://localhost:1555/comp-genomics?type=(ORGANISM-STATS+GENES-WITH-EXP-EVIDENCE)&orgids=IN366) | [0](http://localhost:1555/comp-genomics?type=(ORGANISM-STATS+GENES-WITH-EXP-EVIDENCE)&orgids=IN370) |
| [Pseudogenes](http://localhost:1555/comp-genomics?type=(ORGANISM-STATS+PSEUDO-GENES)&orgids=(IN55195+I012T4+INKY1+IN366+IN370)" \t "_blank) | [0](http://localhost:1555/comp-genomics?type=(ORGANISM-STATS+PSEUDO-GENES)&orgids=IN55195) | [0](http://localhost:1555/comp-genomics?type=(ORGANISM-STATS+PSEUDO-GENES)&orgids=I012T4) | [0](http://localhost:1555/comp-genomics?type=(ORGANISM-STATS+PSEUDO-GENES)&orgids=INKY1) | [0](http://localhost:1555/comp-genomics?type=(ORGANISM-STATS+PSEUDO-GENES)&orgids=IN366) | [0](http://localhost:1555/comp-genomics?type=(ORGANISM-STATS+PSEUDO-GENES)&orgids=IN370) |
| [Essential Genes](http://localhost:1555/comp-genomics?type=(ORGANISM-STATS+ESSENTIAL-GENES)&orgids=(IN55195+I012T4+INKY1+IN366+IN370)" \t "_blank) | [0](http://localhost:1555/comp-genomics?type=(ORGANISM-STATS+ESSENTIAL-GENES)&orgids=IN55195) | [0](http://localhost:1555/comp-genomics?type=(ORGANISM-STATS+ESSENTIAL-GENES)&orgids=I012T4) | [0](http://localhost:1555/comp-genomics?type=(ORGANISM-STATS+ESSENTIAL-GENES)&orgids=INKY1) | [0](http://localhost:1555/comp-genomics?type=(ORGANISM-STATS+ESSENTIAL-GENES)&orgids=IN366) | [0](http://localhost:1555/comp-genomics?type=(ORGANISM-STATS+ESSENTIAL-GENES)&orgids=IN370) |
| [%GC Content](http://localhost:1555/comp-genomics?type=(ORGANISM-STATS+GC-CONTENT)&orgids=(IN55195+I012T4+INKY1+IN366+IN370)) | 32.55 | 32.38 | 33.35 | 32.58 | 32.82 |
| [Protein Features](http://localhost:1555/comp-genomics?type=(ORGANISM-STATS+PROTEIN-FEATURES)&orgids=(IN55195+I012T4+INKY1+IN366+IN370)) | [0](http://localhost:1555/comp-genomics?type=(ORGANISM-STATS+PROTEIN-FEATURES)&orgids=IN55195) | [0](http://localhost:1555/comp-genomics?type=(ORGANISM-STATS+PROTEIN-FEATURES)&orgids=I012T4) | [0](http://localhost:1555/comp-genomics?type=(ORGANISM-STATS+PROTEIN-FEATURES)&orgids=INKY1) | [0](http://localhost:1555/comp-genomics?type=(ORGANISM-STATS+PROTEIN-FEATURES)&orgids=IN366) | [0](http://localhost:1555/comp-genomics?type=(ORGANISM-STATS+PROTEIN-FEATURES)&orgids=IN370) |
| [Protein Complexes](http://localhost:1555/comp-genomics?type=(ORGANISM-STATS+COMPLEXES)&orgids=(IN55195+I012T4+INKY1+IN366+IN370)) | [0](http://localhost:1555/comp-genomics?type=(ORGANISM-STATS+COMPLEXES)&orgids=IN55195) | [35](http://localhost:1555/comp-genomics?type=(ORGANISM-STATS+COMPLEXES)&orgids=I012T4) | [24](http://localhost:1555/comp-genomics?type=(ORGANISM-STATS+COMPLEXES)&orgids=INKY1) | [0](http://localhost:1555/comp-genomics?type=(ORGANISM-STATS+COMPLEXES)&orgids=IN366) | [0](http://localhost:1555/comp-genomics?type=(ORGANISM-STATS+COMPLEXES)&orgids=IN370) |
| [Pathways](http://localhost:1555/comp-genomics?type=(ORGANISM-STATS+PATHWAYS)&orgids=(IN55195+I012T4+INKY1+IN366+IN370)) | [114](http://localhost:1555/comp-genomics?type=(ORGANISM-STATS+PATHWAYS)&orgids=IN55195) | [110](http://localhost:1555/comp-genomics?type=(ORGANISM-STATS+PATHWAYS)&orgids=I012T4) | [108](http://localhost:1555/comp-genomics?type=(ORGANISM-STATS+PATHWAYS)&orgids=INKY1) | [118](http://localhost:1555/comp-genomics?type=(ORGANISM-STATS+PATHWAYS)&orgids=IN366) | [105](http://localhost:1555/comp-genomics?type=(ORGANISM-STATS+PATHWAYS)&orgids=IN370) |
| [Pathways with experimental evidence](http://localhost:1555/comp-genomics?type=(ORGANISM-STATS+PATHWAYS-WITH-EXP-EVIDENCE)&orgids=(IN55195+I012T4+INKY1+IN366+IN370)" \t "_blank) | [0](http://localhost:1555/comp-genomics?type=(ORGANISM-STATS+PATHWAYS-WITH-EXP-EVIDENCE)&orgids=IN55195) | [0](http://localhost:1555/comp-genomics?type=(ORGANISM-STATS+PATHWAYS-WITH-EXP-EVIDENCE)&orgids=I012T4) | [0](http://localhost:1555/comp-genomics?type=(ORGANISM-STATS+PATHWAYS-WITH-EXP-EVIDENCE)&orgids=INKY1) | [0](http://localhost:1555/comp-genomics?type=(ORGANISM-STATS+PATHWAYS-WITH-EXP-EVIDENCE)&orgids=IN366) | [0](http://localhost:1555/comp-genomics?type=(ORGANISM-STATS+PATHWAYS-WITH-EXP-EVIDENCE)&orgids=IN370) |
| [Metabolic Reactions](http://localhost:1555/comp-genomics?type=(ORGANISM-STATS+METABOLIC-RXNS)&orgids=(IN55195+I012T4+INKY1+IN366+IN370)) | [616](http://localhost:1555/comp-genomics?type=(ORGANISM-STATS+METABOLIC-RXNS)&orgids=IN55195) | [599](http://localhost:1555/comp-genomics?type=(ORGANISM-STATS+METABOLIC-RXNS)&orgids=I012T4) | [560](http://localhost:1555/comp-genomics?type=(ORGANISM-STATS+METABOLIC-RXNS)&orgids=INKY1) | [634](http://localhost:1555/comp-genomics?type=(ORGANISM-STATS+METABOLIC-RXNS)&orgids=IN366) | [572](http://localhost:1555/comp-genomics?type=(ORGANISM-STATS+METABOLIC-RXNS)&orgids=IN370) |
| [Metabolic Reactions with experimental evidence](http://localhost:1555/comp-genomics?type=(ORGANISM-STATS+REACTIONS-WITH-EXP-EVIDENCE)&orgids=(IN55195+I012T4+INKY1+IN366+IN370)" \t "_blank) | [0](http://localhost:1555/comp-genomics?type=(ORGANISM-STATS+REACTIONS-WITH-EXP-EVIDENCE)&orgids=IN55195) | [0](http://localhost:1555/comp-genomics?type=(ORGANISM-STATS+REACTIONS-WITH-EXP-EVIDENCE)&orgids=I012T4) | [0](http://localhost:1555/comp-genomics?type=(ORGANISM-STATS+REACTIONS-WITH-EXP-EVIDENCE)&orgids=INKY1) | [0](http://localhost:1555/comp-genomics?type=(ORGANISM-STATS+REACTIONS-WITH-EXP-EVIDENCE)&orgids=IN366) | [0](http://localhost:1555/comp-genomics?type=(ORGANISM-STATS+REACTIONS-WITH-EXP-EVIDENCE)&orgids=IN370) |
| [Transport Reactions](http://localhost:1555/comp-genomics?type=(ORGANISM-STATS+TRANSPORT-RXNS)&orgids=(IN55195+I012T4+INKY1+IN366+IN370)) | [38](http://localhost:1555/comp-genomics?type=(ORGANISM-STATS+TRANSPORT-RXNS)&orgids=IN55195) | [62](http://localhost:1555/comp-genomics?type=(ORGANISM-STATS+TRANSPORT-RXNS)&orgids=I012T4) | [30](http://localhost:1555/comp-genomics?type=(ORGANISM-STATS+TRANSPORT-RXNS)&orgids=INKY1) | [37](http://localhost:1555/comp-genomics?type=(ORGANISM-STATS+TRANSPORT-RXNS)&orgids=IN366) | [32](http://localhost:1555/comp-genomics?type=(ORGANISM-STATS+TRANSPORT-RXNS)&orgids=IN370) |
| [Transport Reactions with experimental evidence](http://localhost:1555/comp-genomics?type=(ORGANISM-STATS+TRANSPORT-REACTIONS-WITH-EXP-EVIDENCE)&orgids=(IN55195+I012T4+INKY1+IN366+IN370)" \t "_blank) | [0](http://localhost:1555/comp-genomics?type=(ORGANISM-STATS+TRANSPORT-REACTIONS-WITH-EXP-EVIDENCE)&orgids=IN55195) | [0](http://localhost:1555/comp-genomics?type=(ORGANISM-STATS+TRANSPORT-REACTIONS-WITH-EXP-EVIDENCE)&orgids=I012T4) | [0](http://localhost:1555/comp-genomics?type=(ORGANISM-STATS+TRANSPORT-REACTIONS-WITH-EXP-EVIDENCE)&orgids=INKY1) | [0](http://localhost:1555/comp-genomics?type=(ORGANISM-STATS+TRANSPORT-REACTIONS-WITH-EXP-EVIDENCE)&orgids=IN366) | [0](http://localhost:1555/comp-genomics?type=(ORGANISM-STATS+TRANSPORT-REACTIONS-WITH-EXP-EVIDENCE)&orgids=IN370) |
| [Compounds](http://localhost:1555/comp-genomics?type=(ORGANISM-STATS+COMPOUNDS)&orgids=(IN55195+I012T4+INKY1+IN366+IN370)) | [672](http://localhost:1555/comp-genomics?type=(ORGANISM-STATS+COMPOUNDS)&orgids=IN55195) | [675](http://localhost:1555/comp-genomics?type=(ORGANISM-STATS+COMPOUNDS)&orgids=I012T4) | [636](http://localhost:1555/comp-genomics?type=(ORGANISM-STATS+COMPOUNDS)&orgids=INKY1) | [685](http://localhost:1555/comp-genomics?type=(ORGANISM-STATS+COMPOUNDS)&orgids=IN366) | [645](http://localhost:1555/comp-genomics?type=(ORGANISM-STATS+COMPOUNDS)&orgids=IN370) |
| [Regulatory Interactions](http://localhost:1555/comp-genomics?type=(ORGANISM-STATS+REGULATORY-INTERACTIONS)&orgids=(IN55195+I012T4+INKY1+IN366+IN370)) | [0](http://localhost:1555/comp-genomics?type=(ORGANISM-STATS+REGULATORY-INTERACTIONS)&orgids=IN55195) | [0](http://localhost:1555/comp-genomics?type=(ORGANISM-STATS+REGULATORY-INTERACTIONS)&orgids=I012T4) | [0](http://localhost:1555/comp-genomics?type=(ORGANISM-STATS+REGULATORY-INTERACTIONS)&orgids=INKY1) | [0](http://localhost:1555/comp-genomics?type=(ORGANISM-STATS+REGULATORY-INTERACTIONS)&orgids=IN366) | [0](http://localhost:1555/comp-genomics?type=(ORGANISM-STATS+REGULATORY-INTERACTIONS)&orgids=IN370) |
| [Transcription Units](http://localhost:1555/comp-genomics?type=(ORGANISM-STATS+TRANSCRIPTION-UNITS)&orgids=(IN55195+I012T4+INKY1+IN366+IN370)) | [622](http://localhost:1555/comp-genomics?type=(ORGANISM-STATS+TRANSCRIPTION-UNITS)&orgids=IN55195) | [618](http://localhost:1555/comp-genomics?type=(ORGANISM-STATS+TRANSCRIPTION-UNITS)&orgids=I012T4) | [768](http://localhost:1555/comp-genomics?type=(ORGANISM-STATS+TRANSCRIPTION-UNITS)&orgids=INKY1) | [676](http://localhost:1555/comp-genomics?type=(ORGANISM-STATS+TRANSCRIPTION-UNITS)&orgids=IN366) | [627](http://localhost:1555/comp-genomics?type=(ORGANISM-STATS+TRANSCRIPTION-UNITS)&orgids=IN370) |
| [Promoters](http://localhost:1555/comp-genomics?type=(ORGANISM-STATS+PROMOTERS)&orgids=(IN55195+I012T4+INKY1+IN366+IN370)) | [0](http://localhost:1555/comp-genomics?type=(ORGANISM-STATS+PROMOTERS)&orgids=IN55195) | [0](http://localhost:1555/comp-genomics?type=(ORGANISM-STATS+PROMOTERS)&orgids=I012T4) | [0](http://localhost:1555/comp-genomics?type=(ORGANISM-STATS+PROMOTERS)&orgids=INKY1) | [0](http://localhost:1555/comp-genomics?type=(ORGANISM-STATS+PROMOTERS)&orgids=IN366) | [0](http://localhost:1555/comp-genomics?type=(ORGANISM-STATS+PROMOTERS)&orgids=IN370) |
| [Transcription Factor Binding Sites](http://localhost:1555/comp-genomics?type=(ORGANISM-STATS+BINDING-SITES)&orgids=(IN55195+I012T4+INKY1+IN366+IN370)) | [0](http://localhost:1555/comp-genomics?type=(ORGANISM-STATS+BINDING-SITES)&orgids=IN55195) | [0](http://localhost:1555/comp-genomics?type=(ORGANISM-STATS+BINDING-SITES)&orgids=I012T4) | [0](http://localhost:1555/comp-genomics?type=(ORGANISM-STATS+BINDING-SITES)&orgids=INKY1) | [0](http://localhost:1555/comp-genomics?type=(ORGANISM-STATS+BINDING-SITES)&orgids=IN366) | [0](http://localhost:1555/comp-genomics?type=(ORGANISM-STATS+BINDING-SITES)&orgids=IN370) |
| [Prophages](http://localhost:1555/comp-genomics?type=(ORGANISM-STATS+PROPHAGES)&orgids=(IN55195+I012T4+INKY1+IN366+IN370)) | [0](http://localhost:1555/comp-genomics?type=(ORGANISM-STATS+PROPHAGES)&orgids=IN55195) | [0](http://localhost:1555/comp-genomics?type=(ORGANISM-STATS+PROPHAGES)&orgids=I012T4) | [0](http://localhost:1555/comp-genomics?type=(ORGANISM-STATS+PROPHAGES)&orgids=INKY1) | [0](http://localhost:1555/comp-genomics?type=(ORGANISM-STATS+PROPHAGES)&orgids=IN366) | [0](http://localhost:1555/comp-genomics?type=(ORGANISM-STATS+PROPHAGES)&orgids=IN370) |
| [Cryptic Prophages](http://localhost:1555/comp-genomics?type=(ORGANISM-STATS+CRYPTIC-PROPHAGES)&orgids=(IN55195+I012T4+INKY1+IN366+IN370)) | [0](http://localhost:1555/comp-genomics?type=(ORGANISM-STATS+CRYPTIC-PROPHAGES)&orgids=IN55195) | [0](http://localhost:1555/comp-genomics?type=(ORGANISM-STATS+CRYPTIC-PROPHAGES)&orgids=I012T4) | [0](http://localhost:1555/comp-genomics?type=(ORGANISM-STATS+CRYPTIC-PROPHAGES)&orgids=INKY1) | [0](http://localhost:1555/comp-genomics?type=(ORGANISM-STATS+CRYPTIC-PROPHAGES)&orgids=IN366) | [0](http://localhost:1555/comp-genomics?type=(ORGANISM-STATS+CRYPTIC-PROPHAGES)&orgids=IN370) |
| [REP Elements](http://localhost:1555/comp-genomics?type=(ORGANISM-STATS+REP-ELEMENTS)&orgids=(IN55195+I012T4+INKY1+IN366+IN370)) | [0](http://localhost:1555/comp-genomics?type=(ORGANISM-STATS+REP-ELEMENTS)&orgids=IN55195) | [0](http://localhost:1555/comp-genomics?type=(ORGANISM-STATS+REP-ELEMENTS)&orgids=I012T4) | [0](http://localhost:1555/comp-genomics?type=(ORGANISM-STATS+REP-ELEMENTS)&orgids=INKY1) | [0](http://localhost:1555/comp-genomics?type=(ORGANISM-STATS+REP-ELEMENTS)&orgids=IN366) | [0](http://localhost:1555/comp-genomics?type=(ORGANISM-STATS+REP-ELEMENTS)&orgids=IN370) |
| [Transposons](http://localhost:1555/comp-genomics?type=(ORGANISM-STATS+TRANSPOSONS)&orgids=(IN55195+I012T4+INKY1+IN366+IN370)) | [0](http://localhost:1555/comp-genomics?type=(ORGANISM-STATS+TRANSPOSONS)&orgids=IN55195) | [0](http://localhost:1555/comp-genomics?type=(ORGANISM-STATS+TRANSPOSONS)&orgids=I012T4) | [0](http://localhost:1555/comp-genomics?type=(ORGANISM-STATS+TRANSPOSONS)&orgids=INKY1) | [0](http://localhost:1555/comp-genomics?type=(ORGANISM-STATS+TRANSPOSONS)&orgids=IN366) | [0](http://localhost:1555/comp-genomics?type=(ORGANISM-STATS+TRANSPOSONS)&orgids=IN370) |
| [Phage Attachment Sites](http://localhost:1555/comp-genomics?type=(ORGANISM-STATS+PHAGE-ATTACHMENT-SITES)&orgids=(IN55195+I012T4+INKY1+IN366+IN370)) | [0](http://localhost:1555/comp-genomics?type=(ORGANISM-STATS+PHAGE-ATTACHMENT-SITES)&orgids=IN55195) | [0](http://localhost:1555/comp-genomics?type=(ORGANISM-STATS+PHAGE-ATTACHMENT-SITES)&orgids=I012T4) | [0](http://localhost:1555/comp-genomics?type=(ORGANISM-STATS+PHAGE-ATTACHMENT-SITES)&orgids=INKY1) | [0](http://localhost:1555/comp-genomics?type=(ORGANISM-STATS+PHAGE-ATTACHMENT-SITES)&orgids=IN366) | [0](http://localhost:1555/comp-genomics?type=(ORGANISM-STATS+PHAGE-ATTACHMENT-SITES)&orgids=IN370) |
| [Publications](http://localhost:1555/comp-genomics?type=(ORGANISM-STATS+PUBLICATIONS)&orgids=(IN55195+I012T4+INKY1+IN366+IN370)) | [811](http://localhost:1555/comp-genomics?type=(ORGANISM-STATS+PUBLICATIONS)&orgids=IN55195) | [1,276](http://localhost:1555/comp-genomics?type=(ORGANISM-STATS+PUBLICATIONS)&orgids=I012T4) | [1,285](http://localhost:1555/comp-genomics?type=(ORGANISM-STATS+PUBLICATIONS)&orgids=INKY1) | [814](http://localhost:1555/comp-genomics?type=(ORGANISM-STATS+PUBLICATIONS)&orgids=IN366) | [797](http://localhost:1555/comp-genomics?type=(ORGANISM-STATS+PUBLICATIONS)&orgids=IN370) |
| [Total GO term annotations](http://localhost:1555/comp-genomics?type=(ORGANISM-STATS+GO-TERMS-ANNOTS)&orgids=(IN55195+I012T4+INKY1+IN366+IN370)) | 0 | 0 | 0 | 0 | 0 |

**Reactions**

**Supplemental Table 5B: Breakdown of Reactions by Type**

This table counts reactions based on the types of their substrates. Clicking on any row, column or cell will show the complete list of reactions included in that category.

| [**Reaction Type**](http://localhost:1555/comp-genomics?type=RXN-TYPES&orgids=(IN55195+I012T4+INKY1+IN366+IN370)) | [*L.iners* ATCC 55195](http://localhost:1555/IN55195/organism-summary) | [*L.iners* I012T4](http://localhost:1555/I012T4/organism-summary) | [*L.iners* KY](http://localhost:1555/INKY1/organism-summary) | [*L.iners* pt1](http://localhost:1555/IN366/organism-summary) | [*L.iners* pt2](http://localhost:1555/IN370/organism-summary) |
| --- | --- | --- | --- | --- | --- |
| [Reactions in which all substrates are small molecules](http://localhost:1555/comp-genomics?type=(RXN-TYPES+SMALL-MOLECULE)&orgids=(IN55195+I012T4+INKY1+IN366+IN370)) | [542](http://localhost:1555/comp-genomics?type=(RXN-TYPES+SMALL-MOLECULE)&orgids=IN55195) | [528](http://localhost:1555/comp-genomics?type=(RXN-TYPES+SMALL-MOLECULE)&orgids=I012T4) | [488](http://localhost:1555/comp-genomics?type=(RXN-TYPES+SMALL-MOLECULE)&orgids=INKY1) | [558](http://localhost:1555/comp-genomics?type=(RXN-TYPES+SMALL-MOLECULE)&orgids=IN366) | [501](http://localhost:1555/comp-genomics?type=(RXN-TYPES+SMALL-MOLECULE)&orgids=IN370) |
| [Reactions of proteins with small molecules](http://localhost:1555/comp-genomics?type=(RXN-TYPES+PROTEIN-SMALL-MOLECULE-REACTION)&orgids=(IN55195+I012T4+INKY1+IN366+IN370)) | [78](http://localhost:1555/comp-genomics?type=(RXN-TYPES+PROTEIN-SMALL-MOLECULE-REACTION)&orgids=IN55195) | [73](http://localhost:1555/comp-genomics?type=(RXN-TYPES+PROTEIN-SMALL-MOLECULE-REACTION)&orgids=I012T4) | [73](http://localhost:1555/comp-genomics?type=(RXN-TYPES+PROTEIN-SMALL-MOLECULE-REACTION)&orgids=INKY1) | [78](http://localhost:1555/comp-genomics?type=(RXN-TYPES+PROTEIN-SMALL-MOLECULE-REACTION)&orgids=IN366) | [77](http://localhost:1555/comp-genomics?type=(RXN-TYPES+PROTEIN-SMALL-MOLECULE-REACTION)&orgids=IN370) |
| [Reactions in which all substrates are proteins](http://localhost:1555/comp-genomics?type=(RXN-TYPES+PROTEIN-REACTION)&orgids=(IN55195+I012T4+INKY1+IN366+IN370)) | [6](http://localhost:1555/comp-genomics?type=(RXN-TYPES+PROTEIN-REACTION)&orgids=IN55195) | [6](http://localhost:1555/comp-genomics?type=(RXN-TYPES+PROTEIN-REACTION)&orgids=I012T4) | [7](http://localhost:1555/comp-genomics?type=(RXN-TYPES+PROTEIN-REACTION)&orgids=INKY1) | [6](http://localhost:1555/comp-genomics?type=(RXN-TYPES+PROTEIN-REACTION)&orgids=IN366) | [8](http://localhost:1555/comp-genomics?type=(RXN-TYPES+PROTEIN-REACTION)&orgids=IN370) |
| [Reactions in which one substrate is a tRNA](http://localhost:1555/comp-genomics?type=(RXN-TYPES+TRNA-REACTION)&orgids=(IN55195+I012T4+INKY1+IN366+IN370)) | [6](http://localhost:1555/comp-genomics?type=(RXN-TYPES+TRNA-REACTION)&orgids=IN55195) | [6](http://localhost:1555/comp-genomics?type=(RXN-TYPES+TRNA-REACTION)&orgids=I012T4) | [6](http://localhost:1555/comp-genomics?type=(RXN-TYPES+TRNA-REACTION)&orgids=INKY1) | [6](http://localhost:1555/comp-genomics?type=(RXN-TYPES+TRNA-REACTION)&orgids=IN366) | [6](http://localhost:1555/comp-genomics?type=(RXN-TYPES+TRNA-REACTION)&orgids=IN370) |
| [Transport reactions](http://localhost:1555/comp-genomics?type=(RXN-TYPES+TRANSPORT)&orgids=(IN55195+I012T4+INKY1+IN366+IN370)) | [39](http://localhost:1555/comp-genomics?type=(RXN-TYPES+TRANSPORT)&orgids=IN55195) | [63](http://localhost:1555/comp-genomics?type=(RXN-TYPES+TRANSPORT)&orgids=I012T4) | [31](http://localhost:1555/comp-genomics?type=(RXN-TYPES+TRANSPORT)&orgids=INKY1) | [38](http://localhost:1555/comp-genomics?type=(RXN-TYPES+TRANSPORT)&orgids=IN366) | [33](http://localhost:1555/comp-genomics?type=(RXN-TYPES+TRANSPORT)&orgids=IN370) |
| [Other reactions](http://localhost:1555/comp-genomics?type=(RXN-TYPES+OTHER)&orgids=(IN55195+I012T4+INKY1+IN366+IN370)) | [115](http://localhost:1555/comp-genomics?type=(RXN-TYPES+OTHER)&orgids=IN55195) | [112](http://localhost:1555/comp-genomics?type=(RXN-TYPES+OTHER)&orgids=I012T4) | [112](http://localhost:1555/comp-genomics?type=(RXN-TYPES+OTHER)&orgids=INKY1) | [113](http://localhost:1555/comp-genomics?type=(RXN-TYPES+OTHER)&orgids=IN366) | [110](http://localhost:1555/comp-genomics?type=(RXN-TYPES+OTHER)&orgids=IN370) |
| [Total number of reactions](http://localhost:1555/comp-genomics?type=(RXN-TYPES+ALL)&orgids=(IN55195+I012T4+INKY1+IN366+IN370)) | [786](http://localhost:1555/comp-genomics?type=(RXN-TYPES+ALL)&orgids=IN55195) | [788](http://localhost:1555/comp-genomics?type=(RXN-TYPES+ALL)&orgids=I012T4) | [717](http://localhost:1555/comp-genomics?type=(RXN-TYPES+ALL)&orgids=INKY1) | [799](http://localhost:1555/comp-genomics?type=(RXN-TYPES+ALL)&orgids=IN366) | [735](http://localhost:1555/comp-genomics?type=(RXN-TYPES+ALL)&orgids=IN370) |

**Supplemental Table 5C: Reactions of Small Molecule Metabolism**

For this table, we show statistics for that subset of reactions that can be classified as reactions of small-molecule metabolism (SMM Reactions). We define SMM Reactions to include all reactions in which all substrates are small molecules, as well as all reactions (enzyme-catalyzed or not) involved in metabolic pathways. This category does include some reactions whose substrates are macromolecules (such as reactions of ACP), because these reactions are parts of pathways, but it does not include reactions of macromolecules in general. It includes reactions that are pathway holes (i.e. for which no enzyme has been identified but which are inferred to be present because they are part of a pathway). Transport reactions are not included in this category.

|  | [*L.iners* ATCC 55195](http://localhost:1555/IN55195/organism-summary) | [*L.iners* I012T4](http://localhost:1555/I012T4/organism-summary) | [*L.iners* KY](http://localhost:1555/INKY1/organism-summary) | [*L.iners* pt1](http://localhost:1555/IN366/organism-summary) | [*L.iners* pt2](http://localhost:1555/IN370/organism-summary) |
| --- | --- | --- | --- | --- | --- |
| [Total number of SMM Reactions](http://localhost:1555/comp-genomics?type=(METAB-RXN-STATS+ALL-METAB-RXNS)&orgids=(IN55195+I012T4+INKY1+IN366+IN370)) | [616](http://localhost:1555/comp-genomics?type=(METAB-RXN-STATS+ALL-METAB-RXNS)&orgids=IN55195) | [599](http://localhost:1555/comp-genomics?type=(METAB-RXN-STATS+ALL-METAB-RXNS)&orgids=I012T4) | [560](http://localhost:1555/comp-genomics?type=(METAB-RXN-STATS+ALL-METAB-RXNS)&orgids=INKY1) | [634](http://localhost:1555/comp-genomics?type=(METAB-RXN-STATS+ALL-METAB-RXNS)&orgids=IN366) | [572](http://localhost:1555/comp-genomics?type=(METAB-RXN-STATS+ALL-METAB-RXNS)&orgids=IN370) |
| [SMM Reactions with identified enzymes](http://localhost:1555/comp-genomics?type=(METAB-RXN-STATS+RXNS-W-ENZYMES)&orgids=(IN55195+I012T4+INKY1+IN366+IN370)) | [449](http://localhost:1555/comp-genomics?type=(METAB-RXN-STATS+RXNS-W-ENZYMES)&orgids=IN55195) | [435](http://localhost:1555/comp-genomics?type=(METAB-RXN-STATS+RXNS-W-ENZYMES)&orgids=I012T4) | [415](http://localhost:1555/comp-genomics?type=(METAB-RXN-STATS+RXNS-W-ENZYMES)&orgids=INKY1) | [467](http://localhost:1555/comp-genomics?type=(METAB-RXN-STATS+RXNS-W-ENZYMES)&orgids=IN366) | [421](http://localhost:1555/comp-genomics?type=(METAB-RXN-STATS+RXNS-W-ENZYMES)&orgids=IN370) |
| [SMM Reactions in more than one pathway](http://localhost:1555/comp-genomics?type=(METAB-RXN-STATS+RXNS-IN-MULTIPLE-PWYS)&orgids=(IN55195+I012T4+INKY1+IN366+IN370)) | [44](http://localhost:1555/comp-genomics?type=(METAB-RXN-STATS+RXNS-IN-MULTIPLE-PWYS)&orgids=IN55195) | [40](http://localhost:1555/comp-genomics?type=(METAB-RXN-STATS+RXNS-IN-MULTIPLE-PWYS)&orgids=I012T4) | [42](http://localhost:1555/comp-genomics?type=(METAB-RXN-STATS+RXNS-IN-MULTIPLE-PWYS)&orgids=INKY1) | [45](http://localhost:1555/comp-genomics?type=(METAB-RXN-STATS+RXNS-IN-MULTIPLE-PWYS)&orgids=IN366) | [42](http://localhost:1555/comp-genomics?type=(METAB-RXN-STATS+RXNS-IN-MULTIPLE-PWYS)&orgids=IN370) |

**Supplemental Table 5D: Breakdown of SMM Reactions by Top-Level EC Category**

This table shows the distribution of reactions in the database across the 6 top-level categories identified by the Enzyme Commission. Included in this table are all reactions in the database which have been assigned either full or partial EC numbers, and for which an enzyme has been identified (that is, these statistics do not include pathway holes).

| [**EC Category**](http://localhost:1555/comp-genomics?type=EC-DIST&orgids=(IN55195+I012T4+INKY1+IN366+IN370)) | [*L.iners* ATCC 55195](http://localhost:1555/IN55195/organism-summary) | [*L.iners* I012T4](http://localhost:1555/I012T4/organism-summary) | [*L.iners* KY](http://localhost:1555/INKY1/organism-summary) | [*L.iners* pt1](http://localhost:1555/IN366/organism-summary) | [*L.iners* pt2](http://localhost:1555/IN370/organism-summary) |
| --- | --- | --- | --- | --- | --- |
| [1 -- Oxidoreductases](http://localhost:1555/comp-genomics?type=(EC-DIST+EC-1)&orgids=(IN55195+I012T4+INKY1+IN366+IN370)) | [49 (9%)](http://localhost:1555/comp-genomics?type=(EC-DIST+EC-1)&orgids=IN55195) | [49 (9%)](http://localhost:1555/comp-genomics?type=(EC-DIST+EC-1)&orgids=I012T4) | [52 (10%)](http://localhost:1555/comp-genomics?type=(EC-DIST+EC-1)&orgids=INKY1) | [52 (9%)](http://localhost:1555/comp-genomics?type=(EC-DIST+EC-1)&orgids=IN366) | [52 (10%)](http://localhost:1555/comp-genomics?type=(EC-DIST+EC-1)&orgids=IN370) |
| [2 -- Transferases](http://localhost:1555/comp-genomics?type=(EC-DIST+EC-2)&orgids=(IN55195+I012T4+INKY1+IN366+IN370)) | [192 (36%)](http://localhost:1555/comp-genomics?type=(EC-DIST+EC-2)&orgids=IN55195) | [175 (34%)](http://localhost:1555/comp-genomics?type=(EC-DIST+EC-2)&orgids=I012T4) | [166 (33%)](http://localhost:1555/comp-genomics?type=(EC-DIST+EC-2)&orgids=INKY1) | [191 (35%)](http://localhost:1555/comp-genomics?type=(EC-DIST+EC-2)&orgids=IN366) | [172 (34%)](http://localhost:1555/comp-genomics?type=(EC-DIST+EC-2)&orgids=IN370) |
| [3 -- Hydrolases](http://localhost:1555/comp-genomics?type=(EC-DIST+EC-3)&orgids=(IN55195+I012T4+INKY1+IN366+IN370)) | [181 (34%)](http://localhost:1555/comp-genomics?type=(EC-DIST+EC-3)&orgids=IN55195) | [180 (35%)](http://localhost:1555/comp-genomics?type=(EC-DIST+EC-3)&orgids=I012T4) | [169 (34%)](http://localhost:1555/comp-genomics?type=(EC-DIST+EC-3)&orgids=INKY1) | [190 (34%)](http://localhost:1555/comp-genomics?type=(EC-DIST+EC-3)&orgids=IN366) | [177 (35%)](http://localhost:1555/comp-genomics?type=(EC-DIST+EC-3)&orgids=IN370) |
| [4 -- Lyases](http://localhost:1555/comp-genomics?type=(EC-DIST+EC-4)&orgids=(IN55195+I012T4+INKY1+IN366+IN370)) | [23 (4%)](http://localhost:1555/comp-genomics?type=(EC-DIST+EC-4)&orgids=IN55195) | [22 (4%)](http://localhost:1555/comp-genomics?type=(EC-DIST+EC-4)&orgids=I012T4) | [21 (4%)](http://localhost:1555/comp-genomics?type=(EC-DIST+EC-4)&orgids=INKY1) | [23 (4%)](http://localhost:1555/comp-genomics?type=(EC-DIST+EC-4)&orgids=IN366) | [18 (4%)](http://localhost:1555/comp-genomics?type=(EC-DIST+EC-4)&orgids=IN370) |
| [5 -- Isomerases](http://localhost:1555/comp-genomics?type=(EC-DIST+EC-5)&orgids=(IN55195+I012T4+INKY1+IN366+IN370)) | [35 (6%)](http://localhost:1555/comp-genomics?type=(EC-DIST+EC-5)&orgids=IN55195) | [36 (7%)](http://localhost:1555/comp-genomics?type=(EC-DIST+EC-5)&orgids=I012T4) | [34 (7%)](http://localhost:1555/comp-genomics?type=(EC-DIST+EC-5)&orgids=INKY1) | [36 (7%)](http://localhost:1555/comp-genomics?type=(EC-DIST+EC-5)&orgids=IN366) | [34 (7%)](http://localhost:1555/comp-genomics?type=(EC-DIST+EC-5)&orgids=IN370) |
| [6 -- Ligases](http://localhost:1555/comp-genomics?type=(EC-DIST+EC-6)&orgids=(IN55195+I012T4+INKY1+IN366+IN370)) | [59 (11%)](http://localhost:1555/comp-genomics?type=(EC-DIST+EC-6)&orgids=IN55195) | [57 (11%)](http://localhost:1555/comp-genomics?type=(EC-DIST+EC-6)&orgids=I012T4) | [56 (11%)](http://localhost:1555/comp-genomics?type=(EC-DIST+EC-6)&orgids=INKY1) | [59 (11%)](http://localhost:1555/comp-genomics?type=(EC-DIST+EC-6)&orgids=IN366) | [55 (11%)](http://localhost:1555/comp-genomics?type=(EC-DIST+EC-6)&orgids=IN370) |
| [Total reactions with full or partial EC Numbers](http://localhost:1555/comp-genomics?type=(EC-DIST+TOTAL)&orgids=(IN55195+I012T4+INKY1+IN366+IN370)) | 539 | 519 | 498 | 551 | 508 |

**Supplemental Table 5E: Shared Reactions**

This table counts the reactions that are shared between pairs of organisms. The number in parentheses represent the Jaccard similarity coefficient for the reactions.

| [**Reactions Shared by Organism Pairs**](http://localhost:1555/comp-genomics?type=REACTION-SHARED&orgids=(IN55195+I012T4+INKY1+IN366+IN370)) | [*L.iners* ATCC 55195](http://localhost:1555/IN55195/organism-summary) | [*L.iners* I012T4](http://localhost:1555/I012T4/organism-summary) | [*L.iners* KY](http://localhost:1555/INKY1/organism-summary) | [*L.iners* pt1](http://localhost:1555/IN366/organism-summary) | [*L.iners* pt2](http://localhost:1555/IN370/organism-summary) |
| --- | --- | --- | --- | --- | --- |
| [*Lactobacillus iners* ATCC 55195](http://localhost:1555/comp-genomics?type=(REACTION-SHARED+IN55195)&orgids=(IN55195+I012T4+INKY1+IN366+IN370)) | [786 (1.000)](http://localhost:1555/comp-genomics?type=(REACTION-SHARED+IN55195)&orgids=IN55195) | [718 (0.839)](http://localhost:1555/comp-genomics?type=(REACTION-SHARED+IN55195)&orgids=(IN55195+I012T4)) | [693 (0.856)](http://localhost:1555/comp-genomics?type=(REACTION-SHARED+IN55195)&orgids=(IN55195+INKY1)) | [777 (0.962)](http://localhost:1555/comp-genomics?type=(REACTION-SHARED+IN55195)&orgids=(IN55195+IN366)) | [718 (0.894)](http://localhost:1555/comp-genomics?type=(REACTION-SHARED+IN55195)&orgids=(IN55195+IN370)) |
| [*Lactobacillus iners* I012T4](http://localhost:1555/comp-genomics?type=(REACTION-SHARED+I012T4)&orgids=(IN55195+I012T4+INKY1+IN366+IN370)) | [718 (0.839)](http://localhost:1555/comp-genomics?type=(REACTION-SHARED+I012T4)&orgids=(I012T4+IN55195)) | [788 (1.000)](http://localhost:1555/comp-genomics?type=(REACTION-SHARED+I012T4)&orgids=I012T4) | [700 (0.870)](http://localhost:1555/comp-genomics?type=(REACTION-SHARED+I012T4)&orgids=(I012T4+INKY1)) | [719 (0.828)](http://localhost:1555/comp-genomics?type=(REACTION-SHARED+I012T4)&orgids=(I012T4+IN366)) | [664 (0.773)](http://localhost:1555/comp-genomics?type=(REACTION-SHARED+I012T4)&orgids=(I012T4+IN370)) |
| [*Lactobacillus iners KY*](http://localhost:1555/comp-genomics?type=(REACTION-SHARED+INKY1)&orgids=(IN55195+I012T4+INKY1+IN366+IN370)) | [693 (0.856)](http://localhost:1555/comp-genomics?type=(REACTION-SHARED+INKY1)&orgids=(INKY1+IN55195)) | [700 (0.870)](http://localhost:1555/comp-genomics?type=(REACTION-SHARED+INKY1)&orgids=(INKY1+I012T4)) | [717 (1.000)](http://localhost:1555/comp-genomics?type=(REACTION-SHARED+INKY1)&orgids=INKY1) | [693 (0.842)](http://localhost:1555/comp-genomics?type=(REACTION-SHARED+INKY1)&orgids=(INKY1+IN366)) | [645 (0.799)](http://localhost:1555/comp-genomics?type=(REACTION-SHARED+INKY1)&orgids=(INKY1+IN370)) |
| [*Lactobacillus iners* pt1](http://localhost:1555/comp-genomics?type=(REACTION-SHARED+IN366)&orgids=(IN55195+I012T4+INKY1+IN366+IN370)) | [777 (0.962)](http://localhost:1555/comp-genomics?type=(REACTION-SHARED+IN366)&orgids=(IN366+IN55195)) | [719 (0.828)](http://localhost:1555/comp-genomics?type=(REACTION-SHARED+IN366)&orgids=(IN366+I012T4)) | [693 (0.842)](http://localhost:1555/comp-genomics?type=(REACTION-SHARED+IN366)&orgids=(IN366+INKY1)) | [799 (1.000)](http://localhost:1555/comp-genomics?type=(REACTION-SHARED+IN366)&orgids=IN366) | [728 (0.903)](http://localhost:1555/comp-genomics?type=(REACTION-SHARED+IN366)&orgids=(IN366+IN370)) |
| [*Lactobacillus iners* pt2](http://localhost:1555/comp-genomics?type=(REACTION-SHARED+IN370)&orgids=(IN55195+I012T4+INKY1+IN366+IN370)) | [718 (0.894)](http://localhost:1555/comp-genomics?type=(REACTION-SHARED+IN370)&orgids=(IN370+IN55195)) | [664 (0.773)](http://localhost:1555/comp-genomics?type=(REACTION-SHARED+IN370)&orgids=(IN370+I012T4)) | [645 (0.799)](http://localhost:1555/comp-genomics?type=(REACTION-SHARED+IN370)&orgids=(IN370+INKY1)) | [728 (0.903)](http://localhost:1555/comp-genomics?type=(REACTION-SHARED+IN370)&orgids=(IN370+IN366)) | [735 (1.000)](http://localhost:1555/comp-genomics?type=(REACTION-SHARED+IN370)&orgids=IN370) |

**Supplemental Table 5F: Unique Reactions**

| **Unique Reactions in Organism**: Unique Reactions | *L.iners* ATCC 55195 | *L.iners* I012T4 | *L.iners* KY | *L.iners* pt1 | *L.iners* pt2 |
| --- | --- | --- | --- | --- | --- |
| [α-D-galactose 6-phosphate ↔ β-D-galactose 6-phosphate](http://localhost:1555/compare-frame-in-orgs?type=NIL&object=RXN-14816&orgids=(IN55195+I012T4+INKY1+IN366+IN370)) | [✓](http://localhost:1555/IN55195/NEW-IMAGE?type=REACTION&object=RXN-14816&orgids=(IN55195%20I012T4%20INKY1%20IN366%20IN370)) |  |  |  |  |
| [2 L-ascorbate + an oxidized unknown electron carrier + 2 H+ → 2 monodehydroascorbate radical + a reduced unknown two electron carrier](http://localhost:1555/compare-frame-in-orgs?type=NIL&object=RXN-10981&orgids=(IN55195+I012T4+INKY1+IN366+IN370)) |  | [✓](http://localhost:1555/I012T4/NEW-IMAGE?type=REACTION&object=RXN-10981&orgids=(IN55195%20I012T4%20INKY1%20IN366%20IN370)) |  |  |  |
| [2 L-ascorbate + hydrogen peroxide → L-ascorbate + dehydroascorbate + 2 H2O](http://localhost:1555/compare-frame-in-orgs?type=NIL&object=RXN-12440&orgids=(IN55195+I012T4+INKY1+IN366+IN370)) |  | [✓](http://localhost:1555/I012T4/NEW-IMAGE?type=REACTION&object=RXN-12440&orgids=(IN55195%20I012T4%20INKY1%20IN366%20IN370)) |  |  |  |
| [2 L-ascorbate + hydrogen peroxide + 2 H+ → 2 monodehydroascorbate radical + 2 H2O](http://localhost:1555/compare-frame-in-orgs?type=NIL&object=RXN-3521&orgids=(IN55195+I012T4+INKY1+IN366+IN370)) |  | [✓](http://localhost:1555/I012T4/NEW-IMAGE?type=REACTION&object=RXN-3521&orgids=(IN55195%20I012T4%20INKY1%20IN366%20IN370)) |  |  |  |
| [2 monodehydroascorbate radical → L-ascorbate + dehydroascorbate + 2 H+](http://localhost:1555/compare-frame-in-orgs?type=NIL&object=RXN-3523&orgids=(IN55195+I012T4+INKY1+IN366+IN370)) |  | [✓](http://localhost:1555/I012T4/NEW-IMAGE?type=REACTION&object=RXN-3523&orgids=(IN55195%20I012T4%20INKY1%20IN366%20IN370)) |  |  |  |
| [*N*-(5-phosphoribosyl)-anthranilate + diphosphate = anthranilate + 5-phospho-α-D-ribose 1-diphosphate](http://localhost:1555/compare-frame-in-orgs?type=NIL&object=PRTRANS-RXN&orgids=(IN55195+I012T4+INKY1+IN366+IN370)) |  | [✓](http://localhost:1555/I012T4/NEW-IMAGE?type=REACTION&object=PRTRANS-RXN&orgids=(IN55195%20I012T4%20INKY1%20IN366%20IN370)) |  |  |  |
| [*S*-adenosyl-L-methionine + a 5-(aminomethyl)-2-thiouridine34 in tRNA → *S*-adenosyl-L-homocysteine + a 5-[(methylamino)methyl]-2-thiouridine34 in tRNA + H+](http://localhost:1555/compare-frame-in-orgs?type=NIL&object=RXN0-5144&orgids=(IN55195+I012T4+INKY1+IN366+IN370)) |  | [✓](http://localhost:1555/I012T4/NEW-IMAGE?type=REACTION&object=RXN0-5144&orgids=(IN55195%20I012T4%20INKY1%20IN366%20IN370)) |  |  |  |
| [*sn*-glycerol 3-phosphate + dioxygen → hydrogen peroxide + glycerone phosphate](http://localhost:1555/compare-frame-in-orgs?type=NIL&object=GLYCEROL-3-PHOSPHATE-OXIDASE-RXN&orgids=(IN55195+I012T4+INKY1+IN366+IN370)) |  |  |  | [✓](http://localhost:1555/IN366/NEW-IMAGE?type=REACTION&object=GLYCEROL-3-PHOSPHATE-OXIDASE-RXN&orgids=(IN55195%20I012T4%20INKY1%20IN366%20IN370)) |  |
| [*sn*-glycerol 3-phosphate[in] + a menaquinone[membrane] → glycerone phosphate[in] + a menaquinol[membrane]](http://localhost:1555/compare-frame-in-orgs?type=NIL&object=RXN-15740&orgids=(IN55195+I012T4+INKY1+IN366+IN370)) |  |  |  | [✓](http://localhost:1555/IN366/NEW-IMAGE?type=REACTION&object=RXN-15740&orgids=(IN55195%20I012T4%20INKY1%20IN366%20IN370)) |  |
| [a 2-thiouridine34 in tRNA + GTP + a 5,10-methylenetetrahydrofolate + glycine + an oxidized unknown electron carrier + H2O → a 5-carboxymethylaminomethyl-2-thiouridine34 in tRNA + GDP + a 7,8-dihydrofolate + a reduced unknown two electron carrier + phosphate + 2 H+](http://localhost:1555/compare-frame-in-orgs?type=NIL&object=RXN-18710&orgids=(IN55195+I012T4+INKY1+IN366+IN370)) |  | [✓](http://localhost:1555/I012T4/NEW-IMAGE?type=REACTION&object=RXN-18710&orgids=(IN55195%20I012T4%20INKY1%20IN366%20IN370)) |  |  |  |
| [a 5-carboxymethylaminomethyl-2-thiouridine34 in tRNA + FAD + H2O + 2 H+ → a 5-(aminomethyl)-2-thiouridine34 in tRNA + glyoxylate + FADH2](http://localhost:1555/compare-frame-in-orgs?type=NIL&object=RXN0-7081&orgids=(IN55195+I012T4+INKY1+IN366+IN370)) |  | [✓](http://localhost:1555/I012T4/NEW-IMAGE?type=REACTION&object=RXN0-7081&orgids=(IN55195%20I012T4%20INKY1%20IN366%20IN370)) |  |  |  |
| [a 5-methylaminomethyl-2-(*Se*-phospho)selenouridine34 in tRNA + H2O → a 5-methylaminomethyl-2-selenouridine34 in tRNA + phosphate](http://localhost:1555/compare-frame-in-orgs?type=NIL&object=RXN-20757&orgids=(IN55195+I012T4+INKY1+IN366+IN370)) |  | [✓](http://localhost:1555/I012T4/NEW-IMAGE?type=REACTION&object=RXN-20757&orgids=(IN55195%20I012T4%20INKY1%20IN366%20IN370)) |  |  |  |
| [a branched-chain amino acid[extracellular space] + H+[extracellular space] → a branched-chain amino acid[cytosol] + H+[cytosol]](http://localhost:1555/compare-frame-in-orgs?type=NIL&object=TRANS-RXN1-7&orgids=(IN55195+I012T4+INKY1+IN366+IN370)) |  | [✓](http://localhost:1555/I012T4/NEW-IMAGE?type=REACTION&object=TRANS-RXN1-7&orgids=(IN55195%20I012T4%20INKY1%20IN366%20IN370)) |  |  |  |
| [a dipeptide[extracellular space] + a tripeptide[extracellular space] → a dipeptide[cytosol] + a tripeptide[cytosol]](http://localhost:1555/compare-frame-in-orgs?type=NIL&object=TRANS-RXN1-12&orgids=(IN55195+I012T4+INKY1+IN366+IN370)) |  | [✓](http://localhost:1555/I012T4/NEW-IMAGE?type=REACTION&object=TRANS-RXN1-12&orgids=(IN55195%20I012T4%20INKY1%20IN366%20IN370)) |  |  |  |
| [a metal cation[extracellular space] → a metal cation[cytosol]](http://localhost:1555/compare-frame-in-orgs?type=NIL&object=TRANS-RXN1-4&orgids=(IN55195+I012T4+INKY1+IN366+IN370)) |  | [✓](http://localhost:1555/I012T4/NEW-IMAGE?type=REACTION&object=TRANS-RXN1-4&orgids=(IN55195%20I012T4%20INKY1%20IN366%20IN370)) |  |  |  |
| [a metal cation[extracellular space] + ATP + H2O → a metal cation[cytosol] + ADP + phosphate + H+](http://localhost:1555/compare-frame-in-orgs?type=NIL&object=RXN1-1&orgids=(IN55195+I012T4+INKY1+IN366+IN370)) |  | [✓](http://localhost:1555/I012T4/NEW-IMAGE?type=REACTION&object=RXN1-1&orgids=(IN55195%20I012T4%20INKY1%20IN366%20IN370)) |  |  |  |
| [a peptide[extracellular space] + ATP + H2O → a peptide[cytosol] + ADP + phosphate + H+](http://localhost:1555/compare-frame-in-orgs?type=NIL&object=RXN1-8&orgids=(IN55195+I012T4+INKY1+IN366+IN370)) |  | [✓](http://localhost:1555/I012T4/NEW-IMAGE?type=REACTION&object=RXN1-8&orgids=(IN55195%20I012T4%20INKY1%20IN366%20IN370)) |  |  |  |
| [a polysaccharide[extracellular space] → a polysaccharide[cytosol]](http://localhost:1555/compare-frame-in-orgs?type=NIL&object=TRANS-RXN1-5&orgids=(IN55195+I012T4+INKY1+IN366+IN370)) |  | [✓](http://localhost:1555/I012T4/NEW-IMAGE?type=REACTION&object=TRANS-RXN1-5&orgids=(IN55195%20I012T4%20INKY1%20IN366%20IN370)) |  |  |  |
| [a purine[extracellular space] → a purine[cytosol]](http://localhost:1555/compare-frame-in-orgs?type=NIL&object=TRANS-RXN1-3&orgids=(IN55195+I012T4+INKY1+IN366+IN370)) |  | [✓](http://localhost:1555/I012T4/NEW-IMAGE?type=REACTION&object=TRANS-RXN1-3&orgids=(IN55195%20I012T4%20INKY1%20IN366%20IN370)) |  |  |  |
| [a sugar[extracellular space] → a sugar[cytosol]](http://localhost:1555/compare-frame-in-orgs?type=NIL&object=TRANS-RXN1-6&orgids=(IN55195+I012T4+INKY1+IN366+IN370)) |  | [✓](http://localhost:1555/I012T4/NEW-IMAGE?type=REACTION&object=TRANS-RXN1-6&orgids=(IN55195%20I012T4%20INKY1%20IN366%20IN370)) |  |  |  |
| [a sugar[extracellular space] + ATP + H2O → a sugar[cytosol] + ADP + phosphate + H+](http://localhost:1555/compare-frame-in-orgs?type=NIL&object=RXN1-2&orgids=(IN55195+I012T4+INKY1+IN366+IN370)) |  | [✓](http://localhost:1555/I012T4/NEW-IMAGE?type=REACTION&object=RXN1-2&orgids=(IN55195%20I012T4%20INKY1%20IN366%20IN370)) |  |  |  |
| [a [TusA sulfur-carrier protein]-S-sulfanyl-L-cysteine + a [TusD]-L-cysteine → a [TusA]-L-cysteine + a [TusD sulfur-carrier protein]-S-sulfanyl-L-cysteine](http://localhost:1555/compare-frame-in-orgs?type=NIL&object=RXN-18709&orgids=(IN55195+I012T4+INKY1+IN366+IN370)) |  | [✓](http://localhost:1555/I012T4/NEW-IMAGE?type=REACTION&object=RXN-18709&orgids=(IN55195%20I012T4%20INKY1%20IN366%20IN370)) |  |  |  |
| [a [TusD sulfur-carrier protein]-S-sulfanyl-L-cysteine + a [TusE sulfur carrier protein]-L-cysteine → a [TusD]-L-cysteine + a [TusE sulfur carrier protein]-*S*-sulfanylcysteine](http://localhost:1555/compare-frame-in-orgs?type=NIL&object=RXN-18708&orgids=(IN55195+I012T4+INKY1+IN366+IN370)) |  | [✓](http://localhost:1555/I012T4/NEW-IMAGE?type=REACTION&object=RXN-18708&orgids=(IN55195%20I012T4%20INKY1%20IN366%20IN370)) |  |  |  |
| [an amino acid[extracellular space] + ATP + H2O → an amino acid[cytosol] + ADP + phosphate + H+](http://localhost:1555/compare-frame-in-orgs?type=NIL&object=RXN1-4&orgids=(IN55195+I012T4+INKY1+IN366+IN370)) |  | [✓](http://localhost:1555/I012T4/NEW-IMAGE?type=REACTION&object=RXN1-4&orgids=(IN55195%20I012T4%20INKY1%20IN366%20IN370)) |  |  |  |
| [an amino acid[extracellular space] + H+[extracellular space] → an amino acid[cytosol] + H+[cytosol]](http://localhost:1555/compare-frame-in-orgs?type=NIL&object=TRANS-RXN1-1&orgids=(IN55195+I012T4+INKY1+IN366+IN370)) |  | [✓](http://localhost:1555/I012T4/NEW-IMAGE?type=REACTION&object=TRANS-RXN1-1&orgids=(IN55195%20I012T4%20INKY1%20IN366%20IN370)) |  |  |  |
| [an oligopeptide[extracellular space] + ATP + H2O → an oligopeptide[cytosol] + ADP + phosphate + H+](http://localhost:1555/compare-frame-in-orgs?type=NIL&object=3.6.3.23-RXN&orgids=(IN55195+I012T4+INKY1+IN366+IN370)) |  | [✓](http://localhost:1555/I012T4/NEW-IMAGE?type=REACTION&object=3.6.3.23-RXN&orgids=(IN55195%20I012T4%20INKY1%20IN366%20IN370)) |  |  |  |
| [an [HPr protein]-*Nπ*-phospho-L-histidine + α-D-galactopyranose[out] → α-D-galactose 6-phosphate[in] + an [HPr]-L-histidine](http://localhost:1555/compare-frame-in-orgs?type=NIL&object=RXN-15170&orgids=(IN55195+I012T4+INKY1+IN366+IN370)) | [✓](http://localhost:1555/IN55195/NEW-IMAGE?type=REACTION&object=RXN-15170&orgids=(IN55195%20I012T4%20INKY1%20IN366%20IN370)) |  |  |  |  |
| [an [HPr protein]-*Nπ*-phospho-L-histidine + β-D-galactopyranose[out] → β-D-galactose 6-phosphate[in] + an [HPr]-L-histidine](http://localhost:1555/compare-frame-in-orgs?type=NIL&object=RXN-15171&orgids=(IN55195+I012T4+INKY1+IN366+IN370)) | [✓](http://localhost:1555/IN55195/NEW-IMAGE?type=REACTION&object=RXN-15171&orgids=(IN55195%20I012T4%20INKY1%20IN366%20IN370)) |  |  |  |  |
| [an [HPr protein]-*Nπ*-phospho-L-histidine + *aldehydo*-D-galactose[out] → *aldehydo*-D-galactose 6-phosphate[in] + an [HPr]-L-histidine](http://localhost:1555/compare-frame-in-orgs?type=NIL&object=RXN-15168&orgids=(IN55195+I012T4+INKY1+IN366+IN370)) | [✓](http://localhost:1555/IN55195/NEW-IMAGE?type=REACTION&object=RXN-15168&orgids=(IN55195%20I012T4%20INKY1%20IN366%20IN370)) |  |  |  |  |
| [an [HPr protein]-*Nπ*-phospho-L-histidine + D-fructofuranose[out] → D-fructofuranose 1-phosphate[in] + an [HPr]-L-histidine](http://localhost:1555/compare-frame-in-orgs?type=NIL&object=RXN-15151&orgids=(IN55195+I012T4+INKY1+IN366+IN370)) |  |  | [✓](http://localhost:1555/INKY1/NEW-IMAGE?type=REACTION&object=RXN-15151&orgids=(IN55195%20I012T4%20INKY1%20IN366%20IN370)) |  |  |
| [an [HPr protein]-*Nπ*-phospho-L-histidine + D-fructopyranose[out] → D-fructopyranose 1-phosphate[in] + an [HPr]-L-histidine](http://localhost:1555/compare-frame-in-orgs?type=NIL&object=RXN-15155&orgids=(IN55195+I012T4+INKY1+IN366+IN370)) |  |  | [✓](http://localhost:1555/INKY1/NEW-IMAGE?type=REACTION&object=RXN-15155&orgids=(IN55195%20I012T4%20INKY1%20IN366%20IN370)) |  |  |
| [an [HPr protein]-*Nπ*-phospho-L-histidine + D-fructose[extracellular space] → D-fructose 1-phosphate[cytosol] + an [HPr]-L-histidine](http://localhost:1555/compare-frame-in-orgs?type=NIL&object=RXN-15084&orgids=(IN55195+I012T4+INKY1+IN366+IN370)) |  |  | [✓](http://localhost:1555/INKY1/NEW-IMAGE?type=REACTION&object=RXN-15084&orgids=(IN55195%20I012T4%20INKY1%20IN366%20IN370)) |  |  |
| [an [HPr protein]-*Nπ*-phospho-L-histidine + D-galactopyranose[out] → D-galactopyranose 6-phosphate[in] + an [HPr]-L-histidine](http://localhost:1555/compare-frame-in-orgs?type=NIL&object=RXN-15169&orgids=(IN55195+I012T4+INKY1+IN366+IN370)) | [✓](http://localhost:1555/IN55195/NEW-IMAGE?type=REACTION&object=RXN-15169&orgids=(IN55195%20I012T4%20INKY1%20IN366%20IN370)) |  |  |  |  |
| [an [HPr protein]-*Nπ*-phospho-L-histidine + D-galactose[out] → a D-galactose 6-phosphate[in] + an [HPr]-L-histidine](http://localhost:1555/compare-frame-in-orgs?type=NIL&object=RXN-15093&orgids=(IN55195+I012T4+INKY1+IN366+IN370)) | [✓](http://localhost:1555/IN55195/NEW-IMAGE?type=REACTION&object=RXN-15093&orgids=(IN55195%20I012T4%20INKY1%20IN366%20IN370)) |  |  |  |  |
| [an [HPr protein]-*Nπ*-phospho-L-histidine + D-glucose[extracellular space] → D-glucose 6-phosphate[cytosol] + an [HPr]-L-histidine](http://localhost:1555/compare-frame-in-orgs?type=NIL&object=RXN-15083&orgids=(IN55195+I012T4+INKY1+IN366+IN370)) |  | [✓](http://localhost:1555/I012T4/NEW-IMAGE?type=REACTION&object=RXN-15083&orgids=(IN55195%20I012T4%20INKY1%20IN366%20IN370)) |  |  |  |
| [an [L-cysteine desulfurase]-*S*-sulfanyl-L-cysteine + a [TusA]-L-cysteine → an [L-cysteine desulfurase]-L-cysteine + a [TusA sulfur-carrier protein]-S-sulfanyl-L-cysteine](http://localhost:1555/compare-frame-in-orgs?type=NIL&object=RXN-18707&orgids=(IN55195+I012T4+INKY1+IN366+IN370)) |  | [✓](http://localhost:1555/I012T4/NEW-IMAGE?type=REACTION&object=RXN-18707&orgids=(IN55195%20I012T4%20INKY1%20IN366%20IN370)) |  |  |  |
| [ATP + *sn*-glycerol 3-phosphate[extracellular space] + H2O → ADP + *sn*-glycerol 3-phosphate[cytosol] + phosphate + H+](http://localhost:1555/compare-frame-in-orgs?type=NIL&object=ABC-34-RXN&orgids=(IN55195+I012T4+INKY1+IN366+IN370)) |  | [✓](http://localhost:1555/I012T4/NEW-IMAGE?type=REACTION&object=ABC-34-RXN&orgids=(IN55195%20I012T4%20INKY1%20IN366%20IN370)) |  |  |  |
| [ATP + L-methionine[extracellular space] + H2O → ADP + L-methionine[cytosol] + phosphate + H+](http://localhost:1555/compare-frame-in-orgs?type=NIL&object=RXN0-4522&orgids=(IN55195+I012T4+INKY1+IN366+IN370)) |  | [✓](http://localhost:1555/I012T4/NEW-IMAGE?type=REACTION&object=RXN0-4522&orgids=(IN55195%20I012T4%20INKY1%20IN366%20IN370)) |  |  |  |
| [ATP + Mn2+[extracellular space] + H2O → ADP + Mn2+[cytosol] + phosphate + H+](http://localhost:1555/compare-frame-in-orgs?type=NIL&object=3.6.3.35-RXN&orgids=(IN55195+I012T4+INKY1+IN366+IN370)) |  | [✓](http://localhost:1555/I012T4/NEW-IMAGE?type=REACTION&object=3.6.3.35-RXN&orgids=(IN55195%20I012T4%20INKY1%20IN366%20IN370)) |  |  |  |
| [ATP + phosphate[extracellular space] + H2O → ADP + phosphate[cytosol] + phosphate[cytosol] + H+](http://localhost:1555/compare-frame-in-orgs?type=NIL&object=RXN1-9&orgids=(IN55195+I012T4+INKY1+IN366+IN370)) |  | [✓](http://localhost:1555/I012T4/NEW-IMAGE?type=REACTION&object=RXN1-9&orgids=(IN55195%20I012T4%20INKY1%20IN366%20IN370)) |  |  |  |
| [chloride[extracellular space] → chloride[cytosol]](http://localhost:1555/compare-frame-in-orgs?type=NIL&object=TRANS-RXN1-13&orgids=(IN55195+I012T4+INKY1+IN366+IN370)) |  | [✓](http://localhost:1555/I012T4/NEW-IMAGE?type=REACTION&object=TRANS-RXN1-13&orgids=(IN55195%20I012T4%20INKY1%20IN366%20IN370)) |  |  |  |
| [choline[extracellular space] + ATP + H2O → choline[cytosol] + ADP + phosphate + H+](http://localhost:1555/compare-frame-in-orgs?type=NIL&object=RXN1-6&orgids=(IN55195+I012T4+INKY1+IN366+IN370)) |  | [✓](http://localhost:1555/I012T4/NEW-IMAGE?type=REACTION&object=RXN1-6&orgids=(IN55195%20I012T4%20INKY1%20IN366%20IN370)) |  |  |  |
| [Co2+[extracellular space] + ATP + H2O → Co2+[cytosol] + ADP + phosphate + H+](http://localhost:1555/compare-frame-in-orgs?type=NIL&object=RXN1-10&orgids=(IN55195+I012T4+INKY1+IN366+IN370)) |  | [✓](http://localhost:1555/I012T4/NEW-IMAGE?type=REACTION&object=RXN1-10&orgids=(IN55195%20I012T4%20INKY1%20IN366%20IN370)) |  |  |  |
| [cytosine[extracellular space] → cytosine[cytosol]](http://localhost:1555/compare-frame-in-orgs?type=NIL&object=TRANS-RXN1-2&orgids=(IN55195+I012T4+INKY1+IN366+IN370)) |  | [✓](http://localhost:1555/I012T4/NEW-IMAGE?type=REACTION&object=TRANS-RXN1-2&orgids=(IN55195%20I012T4%20INKY1%20IN366%20IN370)) |  |  |  |
| [D-xylose[extracellular space] → D-xylose[cytosol]](http://localhost:1555/compare-frame-in-orgs?type=NIL&object=TRANS-RXN1-11&orgids=(IN55195+I012T4+INKY1+IN366+IN370)) |  | [✓](http://localhost:1555/I012T4/NEW-IMAGE?type=REACTION&object=TRANS-RXN1-11&orgids=(IN55195%20I012T4%20INKY1%20IN366%20IN370)) |  |  |  |
| [dehydroascorbate (bicyclic form) → 2,3-didehydro-L-gulonate + H+](http://localhost:1555/compare-frame-in-orgs?type=NIL&object=RXN-12861&orgids=(IN55195+I012T4+INKY1+IN366+IN370)) |  | [✓](http://localhost:1555/I012T4/NEW-IMAGE?type=REACTION&object=RXN-12861&orgids=(IN55195%20I012T4%20INKY1%20IN366%20IN370)) |  |  |  |
| [dehydroascorbate + H2O → 2,3-didehydro-L-gulonate](http://localhost:1555/compare-frame-in-orgs?type=NIL&object=RXN-21400&orgids=(IN55195+I012T4+INKY1+IN366+IN370)) |  | [✓](http://localhost:1555/I012T4/NEW-IMAGE?type=REACTION&object=RXN-21400&orgids=(IN55195%20I012T4%20INKY1%20IN366%20IN370)) |  |  |  |
| [dehydroascorbate + H2O + H+ → dehydroascorbate (bicyclic form)](http://localhost:1555/compare-frame-in-orgs?type=NIL&object=RXN-12862&orgids=(IN55195+I012T4+INKY1+IN366+IN370)) |  | [✓](http://localhost:1555/I012T4/NEW-IMAGE?type=REACTION&object=RXN-12862&orgids=(IN55195%20I012T4%20INKY1%20IN366%20IN370)) |  |  |  |
| [geranyl diphosphate + a 5-[(methylamino)methyl]-2-thiouridine34 in tRNA → a 5-methylaminomethyl-2-(*S*-geranyl)thiouridine34 in tRNA + diphosphate](http://localhost:1555/compare-frame-in-orgs?type=NIL&object=RXN-20755&orgids=(IN55195+I012T4+INKY1+IN366+IN370)) |  | [✓](http://localhost:1555/I012T4/NEW-IMAGE?type=REACTION&object=RXN-20755&orgids=(IN55195%20I012T4%20INKY1%20IN366%20IN370)) |  |  |  |
| [glutamate[extracellular space] + 4-aminobutanoate[cytosol] → glutamate[cytosol] + 4-aminobutanoate[extracellular space]](http://localhost:1555/compare-frame-in-orgs?type=NIL&object=TRANS-RXN1-10&orgids=(IN55195+I012T4+INKY1+IN366+IN370)) |  | [✓](http://localhost:1555/I012T4/NEW-IMAGE?type=REACTION&object=TRANS-RXN1-10&orgids=(IN55195%20I012T4%20INKY1%20IN366%20IN370)) |  |  |  |
| [glycerol + ATP → *sn*-glycerol 3-phosphate + ADP + H+](http://localhost:1555/compare-frame-in-orgs?type=NIL&object=GLYCEROL-KIN-RXN&orgids=(IN55195+I012T4+INKY1+IN366+IN370)) |  |  |  | [✓](http://localhost:1555/IN366/NEW-IMAGE?type=REACTION&object=GLYCEROL-KIN-RXN&orgids=(IN55195%20I012T4%20INKY1%20IN366%20IN370)) |  |
| [glycerol[extracellular space] + H+[extracellular space] → glycerol[cytosol] + H+[cytosol]](http://localhost:1555/compare-frame-in-orgs?type=NIL&object=TRANS-RXN1-8&orgids=(IN55195+I012T4+INKY1+IN366+IN370)) |  | [✓](http://localhost:1555/I012T4/NEW-IMAGE?type=REACTION&object=TRANS-RXN1-8&orgids=(IN55195%20I012T4%20INKY1%20IN366%20IN370)) |  |  |  |
| [glycerol[out] → glycerol[in]](http://localhost:1555/compare-frame-in-orgs?type=NIL&object=TRANS-RXN-131&orgids=(IN55195+I012T4+INKY1+IN366+IN370)) |  |  |  | [✓](http://localhost:1555/IN366/NEW-IMAGE?type=REACTION&object=TRANS-RXN-131&orgids=(IN55195%20I012T4%20INKY1%20IN366%20IN370)) |  |
| [glycine betaine[extracellular space] + ATP + H2O → glycine betaine[cytosol] + ADP + phosphate + H+](http://localhost:1555/compare-frame-in-orgs?type=NIL&object=TRANS-RXN-283&orgids=(IN55195+I012T4+INKY1+IN366+IN370)) |  | [✓](http://localhost:1555/I012T4/NEW-IMAGE?type=REACTION&object=TRANS-RXN-283&orgids=(IN55195%20I012T4%20INKY1%20IN366%20IN370)) |  |  |  |
| [L-ascorbate[extracellular space] + H+[extracellular space] → L-ascorbate[cytosol] + H+[cytosol]](http://localhost:1555/compare-frame-in-orgs?type=NIL&object=TRANS-RXN-208&orgids=(IN55195+I012T4+INKY1+IN366+IN370)) |  | [✓](http://localhost:1555/I012T4/NEW-IMAGE?type=REACTION&object=TRANS-RXN-208&orgids=(IN55195%20I012T4%20INKY1%20IN366%20IN370)) |  |  |  |
| [L-carnitine[extracellular space] + ATP + H2O → L-carnitine[cytosol] + ADP + phosphate + H+](http://localhost:1555/compare-frame-in-orgs?type=NIL&object=RXN1-7&orgids=(IN55195+I012T4+INKY1+IN366+IN370)) |  | [✓](http://localhost:1555/I012T4/NEW-IMAGE?type=REACTION&object=RXN1-7&orgids=(IN55195%20I012T4%20INKY1%20IN366%20IN370)) |  |  |  |
| [Mg2+[extracellular space] → Mg2+[cytosol]](http://localhost:1555/compare-frame-in-orgs?type=NIL&object=TRANS-RXN-141&orgids=(IN55195+I012T4+INKY1+IN366+IN370)) |  | [✓](http://localhost:1555/I012T4/NEW-IMAGE?type=REACTION&object=TRANS-RXN-141&orgids=(IN55195%20I012T4%20INKY1%20IN366%20IN370)) |  |  |  |
| [Na+[extracellular space] + ATP + H2O → Na+[cytosol] + ADP + phosphate + H+](http://localhost:1555/compare-frame-in-orgs?type=NIL&object=RXN1-3&orgids=(IN55195+I012T4+INKY1+IN366+IN370)) |  | [✓](http://localhost:1555/I012T4/NEW-IMAGE?type=REACTION&object=RXN1-3&orgids=(IN55195%20I012T4%20INKY1%20IN366%20IN370)) |  |  |  |
| [phosphate[cytosol] ← phosphate[extracellular space]](http://localhost:1555/compare-frame-in-orgs?type=NIL&object=TRANS-RXN0-470&orgids=(IN55195+I012T4+INKY1+IN366+IN370)) |  | [✓](http://localhost:1555/I012T4/NEW-IMAGE?type=REACTION&object=TRANS-RXN0-470&orgids=(IN55195%20I012T4%20INKY1%20IN366%20IN370)) |  |  |  |
| [selenophosphate + a 5-methylaminomethyl-2-(*S*-geranyl)thiouridine34 in tRNA → a 5-methylaminomethyl-2-(*Se*-phospho)selenouridine34 in tRNA + (2E)-3,7-dimethylocta-2,6-diene-1-thiol](http://localhost:1555/compare-frame-in-orgs?type=NIL&object=RXN-20756&orgids=(IN55195+I012T4+INKY1+IN366+IN370)) |  | [✓](http://localhost:1555/I012T4/NEW-IMAGE?type=REACTION&object=RXN-20756&orgids=(IN55195%20I012T4%20INKY1%20IN366%20IN370)) |  |  |  |
| [Und-PP-{β-D-GlcNAc-(1→4)-Mur2Ac-L-Ala-γ-D-iGln-[*N*6-(Gly5)]-L-Lys-D-Ala-D-Ala}(n+1) + a peptidoglycan internal segment (*S. aureus*) → a peptidoglycan with D,D cross-link (S. aureus) + D-alanine](http://localhost:1555/compare-frame-in-orgs?type=NIL&object=RXN-11065&orgids=(IN55195+I012T4+INKY1+IN366+IN370)) |  |  |  |  | [✓](http://localhost:1555/IN370/NEW-IMAGE?type=REACTION&object=RXN-11065&orgids=(IN55195%20I012T4%20INKY1%20IN366%20IN370)) |
| [uracil[cytosol] ← uracil[extracellular space]](http://localhost:1555/compare-frame-in-orgs?type=NIL&object=TRANS-RXN0-560&orgids=(IN55195+I012T4+INKY1+IN366+IN370)) |  | [✓](http://localhost:1555/I012T4/NEW-IMAGE?type=REACTION&object=TRANS-RXN0-560&orgids=(IN55195%20I012T4%20INKY1%20IN366%20IN370)) |  |  |  |
| [uracil[extracellular space] + H+[extracellular space] ↔ uracil[cytosol] + H+[cytosol]](http://localhost:1555/compare-frame-in-orgs?type=NIL&object=TRANS-RXN-132&orgids=(IN55195+I012T4+INKY1+IN366+IN370)) |  | [✓](http://localhost:1555/I012T4/NEW-IMAGE?type=REACTION&object=TRANS-RXN-132&orgids=(IN55195%20I012T4%20INKY1%20IN366%20IN370)) |  |  |  |
| [xanthine[extracellular space] + uracil[extracellular space] → xanthine[cytosol] + uracil[cytosol]](http://localhost:1555/compare-frame-in-orgs?type=NIL&object=TRANS-RXN1-9&orgids=(IN55195+I012T4+INKY1+IN366+IN370)) |  | [✓](http://localhost:1555/I012T4/NEW-IMAGE?type=REACTION&object=TRANS-RXN1-9&orgids=(IN55195%20I012T4%20INKY1%20IN366%20IN370)) |  |  |  |
| [Zn2+[extracellular space] + ATP + H2O → Zn2+[cytosol] + ADP + phosphate + H+](http://localhost:1555/compare-frame-in-orgs?type=NIL&object=ABC-63-RXN&orgids=(IN55195+I012T4+INKY1+IN366+IN370)) |  | [✓](http://localhost:1555/I012T4/NEW-IMAGE?type=REACTION&object=ABC-63-RXN&orgids=(IN55195%20I012T4%20INKY1%20IN366%20IN370)) |  |  |  |
| Total | [6](http://localhost:1555/comp-genomics?type=(REACTION-UNIQUE+UNIQUE-REACTIONS)&orgids=IN55195) | [51](http://localhost:1555/comp-genomics?type=(REACTION-UNIQUE+UNIQUE-REACTIONS)&orgids=I012T4) | [3](http://localhost:1555/comp-genomics?type=(REACTION-UNIQUE+UNIQUE-REACTIONS)&orgids=INKY1) | [4](http://localhost:1555/comp-genomics?type=(REACTION-UNIQUE+UNIQUE-REACTIONS)&orgids=IN366) | [1](http://localhost:1555/comp-genomics?type=(REACTION-UNIQUE+UNIQUE-REACTIONS)&orgids=IN370) |

**Pathways**

**Supplemental Table 5G: Pathway Comparison by Pathway Class**

This table presents statistics on the number of pathways present in each pathway class. The two largest top-level classes, Biosynthesis and Degradation/Utilization/Assimilation, are broken down further to show the distribution of pathways among their next-level subclasses. The vast majority of pathways are assigned to only a single class. However, a small number may be assigned to more than one class; such pathways would be double-counted, making the Total line in this table different from the totals in the Shared Pathways table.

| [**Pathway Class**](http://localhost:1555/comp-genomics?type=PWY-CLASS-DIST&orgids=(IN55195+I012T4+INKY1+IN366+IN370)) | [*L.iners* ATCC 55195](http://localhost:1555/IN55195/organism-summary) | [*L.iners* I012T4](http://localhost:1555/I012T4/organism-summary) | [*L.iners* KY](http://localhost:1555/INKY1/organism-summary) | [*L.iners* pt1](http://localhost:1555/IN366/organism-summary) | [*L.iners* pt2](http://localhost:1555/IN370/organism-summary) |
| --- | --- | --- | --- | --- | --- |
| [Biosynthesis](http://localhost:1555/comp-genomics?type=(PWY-CLASS-DIST+%7cBiosynthesis%7c)&orgids=(IN55195+I012T4+INKY1+IN366+IN370)) | 79 | 76 | 74 | 80 | 72 |
| [Amine and Polyamine Biosynthesis](http://localhost:1555/comp-genomics?type=(PWY-CLASS-DIST+%7cPolyamine-Biosynthesis%7c)&orgids=(IN55195+I012T4+INKY1+IN366+IN370)" \t "_blank) | [0](http://localhost:1555/comp-genomics?type=(PWY-CLASS-DIST+%7cPolyamine-Biosynthesis%7c)&orgids=IN55195) | [0](http://localhost:1555/comp-genomics?type=(PWY-CLASS-DIST+%7cPolyamine-Biosynthesis%7c)&orgids=I012T4) | [0](http://localhost:1555/comp-genomics?type=(PWY-CLASS-DIST+%7cPolyamine-Biosynthesis%7c)&orgids=INKY1) | [0](http://localhost:1555/comp-genomics?type=(PWY-CLASS-DIST+%7cPolyamine-Biosynthesis%7c)&orgids=IN366) | [0](http://localhost:1555/comp-genomics?type=(PWY-CLASS-DIST+%7cPolyamine-Biosynthesis%7c)&orgids=IN370) |
| [Amino Acid Biosynthesis](http://localhost:1555/comp-genomics?type=(PWY-CLASS-DIST+%7cAmino-Acid-Biosynthesis%7c)&orgids=(IN55195+I012T4+INKY1+IN366+IN370)" \t "_blank) | [7](http://localhost:1555/comp-genomics?type=(PWY-CLASS-DIST+%7cAmino-Acid-Biosynthesis%7c)&orgids=IN55195) | [6](http://localhost:1555/comp-genomics?type=(PWY-CLASS-DIST+%7cAmino-Acid-Biosynthesis%7c)&orgids=I012T4) | [5](http://localhost:1555/comp-genomics?type=(PWY-CLASS-DIST+%7cAmino-Acid-Biosynthesis%7c)&orgids=INKY1) | [7](http://localhost:1555/comp-genomics?type=(PWY-CLASS-DIST+%7cAmino-Acid-Biosynthesis%7c)&orgids=IN366) | [7](http://localhost:1555/comp-genomics?type=(PWY-CLASS-DIST+%7cAmino-Acid-Biosynthesis%7c)&orgids=IN370) |
| [Aminoacyl-tRNA Charging](http://localhost:1555/comp-genomics?type=(PWY-CLASS-DIST+%7cAminoacyl-tRNAs-Charging%7c)&orgids=(IN55195+I012T4+INKY1+IN366+IN370)" \t "_blank) | [3](http://localhost:1555/comp-genomics?type=(PWY-CLASS-DIST+%7cAminoacyl-tRNAs-Charging%7c)&orgids=IN55195) | [2](http://localhost:1555/comp-genomics?type=(PWY-CLASS-DIST+%7cAminoacyl-tRNAs-Charging%7c)&orgids=I012T4) | [2](http://localhost:1555/comp-genomics?type=(PWY-CLASS-DIST+%7cAminoacyl-tRNAs-Charging%7c)&orgids=INKY1) | [3](http://localhost:1555/comp-genomics?type=(PWY-CLASS-DIST+%7cAminoacyl-tRNAs-Charging%7c)&orgids=IN366) | [3](http://localhost:1555/comp-genomics?type=(PWY-CLASS-DIST+%7cAminoacyl-tRNAs-Charging%7c)&orgids=IN370) |
| [Aromatic Compound Biosynthesis](http://localhost:1555/comp-genomics?type=(PWY-CLASS-DIST+AROMATIC-COMPOUNDS-BIOSYN)&orgids=(IN55195+I012T4+INKY1+IN366+IN370)" \t "_blank) | [3](http://localhost:1555/comp-genomics?type=(PWY-CLASS-DIST+AROMATIC-COMPOUNDS-BIOSYN)&orgids=IN55195) | [3](http://localhost:1555/comp-genomics?type=(PWY-CLASS-DIST+AROMATIC-COMPOUNDS-BIOSYN)&orgids=I012T4) | [3](http://localhost:1555/comp-genomics?type=(PWY-CLASS-DIST+AROMATIC-COMPOUNDS-BIOSYN)&orgids=INKY1) | [3](http://localhost:1555/comp-genomics?type=(PWY-CLASS-DIST+AROMATIC-COMPOUNDS-BIOSYN)&orgids=IN366) | [3](http://localhost:1555/comp-genomics?type=(PWY-CLASS-DIST+AROMATIC-COMPOUNDS-BIOSYN)&orgids=IN370) |
| [Carbohydrate Biosynthesis](http://localhost:1555/comp-genomics?type=(PWY-CLASS-DIST+%7cCarbohydrates-Biosynthesis%7c)&orgids=(IN55195+I012T4+INKY1+IN366+IN370)" \t "_blank) | [4](http://localhost:1555/comp-genomics?type=(PWY-CLASS-DIST+%7cCarbohydrates-Biosynthesis%7c)&orgids=IN55195) | [4](http://localhost:1555/comp-genomics?type=(PWY-CLASS-DIST+%7cCarbohydrates-Biosynthesis%7c)&orgids=I012T4) | [4](http://localhost:1555/comp-genomics?type=(PWY-CLASS-DIST+%7cCarbohydrates-Biosynthesis%7c)&orgids=INKY1) | [4](http://localhost:1555/comp-genomics?type=(PWY-CLASS-DIST+%7cCarbohydrates-Biosynthesis%7c)&orgids=IN366) | [4](http://localhost:1555/comp-genomics?type=(PWY-CLASS-DIST+%7cCarbohydrates-Biosynthesis%7c)&orgids=IN370) |
| [Cell Structure Biosynthesis](http://localhost:1555/comp-genomics?type=(PWY-CLASS-DIST+%7cCell-Structure-Biosynthesis%7c)&orgids=(IN55195+I012T4+INKY1+IN366+IN370)" \t "_blank) | [3](http://localhost:1555/comp-genomics?type=(PWY-CLASS-DIST+%7cCell-Structure-Biosynthesis%7c)&orgids=IN55195) | [3](http://localhost:1555/comp-genomics?type=(PWY-CLASS-DIST+%7cCell-Structure-Biosynthesis%7c)&orgids=I012T4) | [3](http://localhost:1555/comp-genomics?type=(PWY-CLASS-DIST+%7cCell-Structure-Biosynthesis%7c)&orgids=INKY1) | [3](http://localhost:1555/comp-genomics?type=(PWY-CLASS-DIST+%7cCell-Structure-Biosynthesis%7c)&orgids=IN366) | [1](http://localhost:1555/comp-genomics?type=(PWY-CLASS-DIST+%7cCell-Structure-Biosynthesis%7c)&orgids=IN370) |
| [Cofactor, Carrier, and Vitamin Biosynthesis](http://localhost:1555/comp-genomics?type=(PWY-CLASS-DIST+%7cCofactor-Biosynthesis%7c)&orgids=(IN55195+I012T4+INKY1+IN366+IN370)" \t "_blank) | [24](http://localhost:1555/comp-genomics?type=(PWY-CLASS-DIST+%7cCofactor-Biosynthesis%7c)&orgids=IN55195) | [24](http://localhost:1555/comp-genomics?type=(PWY-CLASS-DIST+%7cCofactor-Biosynthesis%7c)&orgids=I012T4) | [24](http://localhost:1555/comp-genomics?type=(PWY-CLASS-DIST+%7cCofactor-Biosynthesis%7c)&orgids=INKY1) | [24](http://localhost:1555/comp-genomics?type=(PWY-CLASS-DIST+%7cCofactor-Biosynthesis%7c)&orgids=IN366) | [20](http://localhost:1555/comp-genomics?type=(PWY-CLASS-DIST+%7cCofactor-Biosynthesis%7c)&orgids=IN370) |
| [Fatty Acid and Lipid Biosynthesis](http://localhost:1555/comp-genomics?type=(PWY-CLASS-DIST+%7cLipid-Biosynthesis%7c)&orgids=(IN55195+I012T4+INKY1+IN366+IN370)" \t "_blank) | [6](http://localhost:1555/comp-genomics?type=(PWY-CLASS-DIST+%7cLipid-Biosynthesis%7c)&orgids=IN55195) | [4](http://localhost:1555/comp-genomics?type=(PWY-CLASS-DIST+%7cLipid-Biosynthesis%7c)&orgids=I012T4) | [4](http://localhost:1555/comp-genomics?type=(PWY-CLASS-DIST+%7cLipid-Biosynthesis%7c)&orgids=INKY1) | [7](http://localhost:1555/comp-genomics?type=(PWY-CLASS-DIST+%7cLipid-Biosynthesis%7c)&orgids=IN366) | [6](http://localhost:1555/comp-genomics?type=(PWY-CLASS-DIST+%7cLipid-Biosynthesis%7c)&orgids=IN370) |
| [Metabolic Regulator Biosynthesis](http://localhost:1555/comp-genomics?type=(PWY-CLASS-DIST+%7cMetabolic-Regulators%7c)&orgids=(IN55195+I012T4+INKY1+IN366+IN370)" \t "_blank) | [1](http://localhost:1555/comp-genomics?type=(PWY-CLASS-DIST+%7cMetabolic-Regulators%7c)&orgids=IN55195) | [1](http://localhost:1555/comp-genomics?type=(PWY-CLASS-DIST+%7cMetabolic-Regulators%7c)&orgids=I012T4) | [1](http://localhost:1555/comp-genomics?type=(PWY-CLASS-DIST+%7cMetabolic-Regulators%7c)&orgids=INKY1) | [1](http://localhost:1555/comp-genomics?type=(PWY-CLASS-DIST+%7cMetabolic-Regulators%7c)&orgids=IN366) | [1](http://localhost:1555/comp-genomics?type=(PWY-CLASS-DIST+%7cMetabolic-Regulators%7c)&orgids=IN370) |
| [Nucleoside and Nucleotide Biosynthesis](http://localhost:1555/comp-genomics?type=(PWY-CLASS-DIST+%7cNucleotide-Biosynthesis%7c)&orgids=(IN55195+I012T4+INKY1+IN366+IN370)" \t "_blank) | [19](http://localhost:1555/comp-genomics?type=(PWY-CLASS-DIST+%7cNucleotide-Biosynthesis%7c)&orgids=IN55195) | [19](http://localhost:1555/comp-genomics?type=(PWY-CLASS-DIST+%7cNucleotide-Biosynthesis%7c)&orgids=I012T4) | [19](http://localhost:1555/comp-genomics?type=(PWY-CLASS-DIST+%7cNucleotide-Biosynthesis%7c)&orgids=INKY1) | [19](http://localhost:1555/comp-genomics?type=(PWY-CLASS-DIST+%7cNucleotide-Biosynthesis%7c)&orgids=IN366) | [19](http://localhost:1555/comp-genomics?type=(PWY-CLASS-DIST+%7cNucleotide-Biosynthesis%7c)&orgids=IN370) |
| [Other Biosynthesis](http://localhost:1555/comp-genomics?type=(PWY-CLASS-DIST+%7cOther-biosynthesis%7c)&orgids=(IN55195+I012T4+INKY1+IN366+IN370)" \t "_blank) | [0](http://localhost:1555/comp-genomics?type=(PWY-CLASS-DIST+%7cOther-biosynthesis%7c)&orgids=IN55195) | [0](http://localhost:1555/comp-genomics?type=(PWY-CLASS-DIST+%7cOther-biosynthesis%7c)&orgids=I012T4) | [0](http://localhost:1555/comp-genomics?type=(PWY-CLASS-DIST+%7cOther-biosynthesis%7c)&orgids=INKY1) | [0](http://localhost:1555/comp-genomics?type=(PWY-CLASS-DIST+%7cOther-biosynthesis%7c)&orgids=IN366) | [0](http://localhost:1555/comp-genomics?type=(PWY-CLASS-DIST+%7cOther-biosynthesis%7c)&orgids=IN370) |
| [Polyprenyl Biosynthesis](http://localhost:1555/comp-genomics?type=(PWY-CLASS-DIST+%7cPolyprenyl-Biosynthesis%7c)&orgids=(IN55195+I012T4+INKY1+IN366+IN370)" \t "_blank) | [2](http://localhost:1555/comp-genomics?type=(PWY-CLASS-DIST+%7cPolyprenyl-Biosynthesis%7c)&orgids=IN55195) | [2](http://localhost:1555/comp-genomics?type=(PWY-CLASS-DIST+%7cPolyprenyl-Biosynthesis%7c)&orgids=I012T4) | [2](http://localhost:1555/comp-genomics?type=(PWY-CLASS-DIST+%7cPolyprenyl-Biosynthesis%7c)&orgids=INKY1) | [2](http://localhost:1555/comp-genomics?type=(PWY-CLASS-DIST+%7cPolyprenyl-Biosynthesis%7c)&orgids=IN366) | [2](http://localhost:1555/comp-genomics?type=(PWY-CLASS-DIST+%7cPolyprenyl-Biosynthesis%7c)&orgids=IN370) |
| [Secondary Metabolite Biosynthesis](http://localhost:1555/comp-genomics?type=(PWY-CLASS-DIST+SECONDARY-METABOLITE-BIOSYNTHESIS)&orgids=(IN55195+I012T4+INKY1+IN366+IN370)" \t "_blank) | [1](http://localhost:1555/comp-genomics?type=(PWY-CLASS-DIST+SECONDARY-METABOLITE-BIOSYNTHESIS)&orgids=IN55195) | [1](http://localhost:1555/comp-genomics?type=(PWY-CLASS-DIST+SECONDARY-METABOLITE-BIOSYNTHESIS)&orgids=I012T4) | [1](http://localhost:1555/comp-genomics?type=(PWY-CLASS-DIST+SECONDARY-METABOLITE-BIOSYNTHESIS)&orgids=INKY1) | [1](http://localhost:1555/comp-genomics?type=(PWY-CLASS-DIST+SECONDARY-METABOLITE-BIOSYNTHESIS)&orgids=IN366) | [1](http://localhost:1555/comp-genomics?type=(PWY-CLASS-DIST+SECONDARY-METABOLITE-BIOSYNTHESIS)&orgids=IN370) |
| [Storage Compound Biosynthesis](http://localhost:1555/comp-genomics?type=(PWY-CLASS-DIST+%7cStorage-Compounds-Biosynthesis%7c)&orgids=(IN55195+I012T4+INKY1+IN366+IN370)" \t "_blank) | [0](http://localhost:1555/comp-genomics?type=(PWY-CLASS-DIST+%7cStorage-Compounds-Biosynthesis%7c)&orgids=IN55195) | [0](http://localhost:1555/comp-genomics?type=(PWY-CLASS-DIST+%7cStorage-Compounds-Biosynthesis%7c)&orgids=I012T4) | [0](http://localhost:1555/comp-genomics?type=(PWY-CLASS-DIST+%7cStorage-Compounds-Biosynthesis%7c)&orgids=INKY1) | [0](http://localhost:1555/comp-genomics?type=(PWY-CLASS-DIST+%7cStorage-Compounds-Biosynthesis%7c)&orgids=IN366) | [0](http://localhost:1555/comp-genomics?type=(PWY-CLASS-DIST+%7cStorage-Compounds-Biosynthesis%7c)&orgids=IN370) |
| [Tetrapyrrole Biosynthesis](http://localhost:1555/comp-genomics?type=(PWY-CLASS-DIST+%7cTetrapyrrole-Biosynthesis%7c)&orgids=(IN55195+I012T4+INKY1+IN366+IN370)" \t "_blank) | [1](http://localhost:1555/comp-genomics?type=(PWY-CLASS-DIST+%7cTetrapyrrole-Biosynthesis%7c)&orgids=IN55195) | [1](http://localhost:1555/comp-genomics?type=(PWY-CLASS-DIST+%7cTetrapyrrole-Biosynthesis%7c)&orgids=I012T4) | [1](http://localhost:1555/comp-genomics?type=(PWY-CLASS-DIST+%7cTetrapyrrole-Biosynthesis%7c)&orgids=INKY1) | [1](http://localhost:1555/comp-genomics?type=(PWY-CLASS-DIST+%7cTetrapyrrole-Biosynthesis%7c)&orgids=IN366) | [1](http://localhost:1555/comp-genomics?type=(PWY-CLASS-DIST+%7cTetrapyrrole-Biosynthesis%7c)&orgids=IN370) |
| [Generation of Precursor Metabolites and Energy](http://localhost:1555/comp-genomics?type=(PWY-CLASS-DIST+%7cEnergy-Metabolism%7c)&orgids=(IN55195+I012T4+INKY1+IN366+IN370)) | [6](http://localhost:1555/comp-genomics?type=(PWY-CLASS-DIST+%7cEnergy-Metabolism%7c)&orgids=IN55195) | [6](http://localhost:1555/comp-genomics?type=(PWY-CLASS-DIST+%7cEnergy-Metabolism%7c)&orgids=I012T4) | [6](http://localhost:1555/comp-genomics?type=(PWY-CLASS-DIST+%7cEnergy-Metabolism%7c)&orgids=INKY1) | [7](http://localhost:1555/comp-genomics?type=(PWY-CLASS-DIST+%7cEnergy-Metabolism%7c)&orgids=IN366) | [6](http://localhost:1555/comp-genomics?type=(PWY-CLASS-DIST+%7cEnergy-Metabolism%7c)&orgids=IN370) |
| [Metabolic Clusters](http://localhost:1555/comp-genomics?type=(PWY-CLASS-DIST+%7cMetabolic-Clusters%7c)&orgids=(IN55195+I012T4+INKY1+IN366+IN370)) | [6](http://localhost:1555/comp-genomics?type=(PWY-CLASS-DIST+%7cMetabolic-Clusters%7c)&orgids=IN55195) | [6](http://localhost:1555/comp-genomics?type=(PWY-CLASS-DIST+%7cMetabolic-Clusters%7c)&orgids=I012T4) | [6](http://localhost:1555/comp-genomics?type=(PWY-CLASS-DIST+%7cMetabolic-Clusters%7c)&orgids=INKY1) | [6](http://localhost:1555/comp-genomics?type=(PWY-CLASS-DIST+%7cMetabolic-Clusters%7c)&orgids=IN366) | [6](http://localhost:1555/comp-genomics?type=(PWY-CLASS-DIST+%7cMetabolic-Clusters%7c)&orgids=IN370) |
| [Bioluminescence](http://localhost:1555/comp-genomics?type=(PWY-CLASS-DIST+%7cBioluminescence%7c)&orgids=(IN55195+I012T4+INKY1+IN366+IN370)) | [0](http://localhost:1555/comp-genomics?type=(PWY-CLASS-DIST+%7cBioluminescence%7c)&orgids=IN55195) | [0](http://localhost:1555/comp-genomics?type=(PWY-CLASS-DIST+%7cBioluminescence%7c)&orgids=I012T4) | [0](http://localhost:1555/comp-genomics?type=(PWY-CLASS-DIST+%7cBioluminescence%7c)&orgids=INKY1) | [0](http://localhost:1555/comp-genomics?type=(PWY-CLASS-DIST+%7cBioluminescence%7c)&orgids=IN366) | [0](http://localhost:1555/comp-genomics?type=(PWY-CLASS-DIST+%7cBioluminescence%7c)&orgids=IN370) |
| [Detoxification](http://localhost:1555/comp-genomics?type=(PWY-CLASS-DIST+%7cDetoxification%7c)&orgids=(IN55195+I012T4+INKY1+IN366+IN370)) | [0](http://localhost:1555/comp-genomics?type=(PWY-CLASS-DIST+%7cDetoxification%7c)&orgids=IN55195) | [2](http://localhost:1555/comp-genomics?type=(PWY-CLASS-DIST+%7cDetoxification%7c)&orgids=I012T4) | [2](http://localhost:1555/comp-genomics?type=(PWY-CLASS-DIST+%7cDetoxification%7c)&orgids=INKY1) | [0](http://localhost:1555/comp-genomics?type=(PWY-CLASS-DIST+%7cDetoxification%7c)&orgids=IN366) | [0](http://localhost:1555/comp-genomics?type=(PWY-CLASS-DIST+%7cDetoxification%7c)&orgids=IN370) |
| [Transport](http://localhost:1555/comp-genomics?type=(PWY-CLASS-DIST+%7cTransport-Pathways%7c)&orgids=(IN55195+I012T4+INKY1+IN366+IN370)) | [0](http://localhost:1555/comp-genomics?type=(PWY-CLASS-DIST+%7cTransport-Pathways%7c)&orgids=IN55195) | [0](http://localhost:1555/comp-genomics?type=(PWY-CLASS-DIST+%7cTransport-Pathways%7c)&orgids=I012T4) | [0](http://localhost:1555/comp-genomics?type=(PWY-CLASS-DIST+%7cTransport-Pathways%7c)&orgids=INKY1) | [0](http://localhost:1555/comp-genomics?type=(PWY-CLASS-DIST+%7cTransport-Pathways%7c)&orgids=IN366) | [0](http://localhost:1555/comp-genomics?type=(PWY-CLASS-DIST+%7cTransport-Pathways%7c)&orgids=IN370) |
| [Macromolecule Modification](http://localhost:1555/comp-genomics?type=(PWY-CLASS-DIST+%7cMacromolecule-Modification%7c)&orgids=(IN55195+I012T4+INKY1+IN366+IN370)) | [4](http://localhost:1555/comp-genomics?type=(PWY-CLASS-DIST+%7cMacromolecule-Modification%7c)&orgids=IN55195) | [5](http://localhost:1555/comp-genomics?type=(PWY-CLASS-DIST+%7cMacromolecule-Modification%7c)&orgids=I012T4) | [5](http://localhost:1555/comp-genomics?type=(PWY-CLASS-DIST+%7cMacromolecule-Modification%7c)&orgids=INKY1) | [4](http://localhost:1555/comp-genomics?type=(PWY-CLASS-DIST+%7cMacromolecule-Modification%7c)&orgids=IN366) | [5](http://localhost:1555/comp-genomics?type=(PWY-CLASS-DIST+%7cMacromolecule-Modification%7c)&orgids=IN370) |
| [Activation/Inactivation/Interconversion](http://localhost:1555/comp-genomics?type=(PWY-CLASS-DIST+%7cActivation-Inactivation-Interconversion%7c)&orgids=(IN55195+I012T4+INKY1+IN366+IN370)) | [1](http://localhost:1555/comp-genomics?type=(PWY-CLASS-DIST+%7cActivation-Inactivation-Interconversion%7c)&orgids=IN55195) | [1](http://localhost:1555/comp-genomics?type=(PWY-CLASS-DIST+%7cActivation-Inactivation-Interconversion%7c)&orgids=I012T4) | [1](http://localhost:1555/comp-genomics?type=(PWY-CLASS-DIST+%7cActivation-Inactivation-Interconversion%7c)&orgids=INKY1) | [1](http://localhost:1555/comp-genomics?type=(PWY-CLASS-DIST+%7cActivation-Inactivation-Interconversion%7c)&orgids=IN366) | [1](http://localhost:1555/comp-genomics?type=(PWY-CLASS-DIST+%7cActivation-Inactivation-Interconversion%7c)&orgids=IN370) |
| [Degradation/Utilization/Assimilation](http://localhost:1555/comp-genomics?type=(PWY-CLASS-DIST+%7cDegradation%7c)&orgids=(IN55195+I012T4+INKY1+IN366+IN370)) | 28 | 24 | 24 | 30 | 25 |
| [Alcohol Degradation](http://localhost:1555/comp-genomics?type=(PWY-CLASS-DIST+%7cAlcohol-Degradation%7c)&orgids=(IN55195+I012T4+INKY1+IN366+IN370)" \t "_blank) | [4](http://localhost:1555/comp-genomics?type=(PWY-CLASS-DIST+%7cAlcohol-Degradation%7c)&orgids=IN55195) | [4](http://localhost:1555/comp-genomics?type=(PWY-CLASS-DIST+%7cAlcohol-Degradation%7c)&orgids=I012T4) | [4](http://localhost:1555/comp-genomics?type=(PWY-CLASS-DIST+%7cAlcohol-Degradation%7c)&orgids=INKY1) | [5](http://localhost:1555/comp-genomics?type=(PWY-CLASS-DIST+%7cAlcohol-Degradation%7c)&orgids=IN366) | [3](http://localhost:1555/comp-genomics?type=(PWY-CLASS-DIST+%7cAlcohol-Degradation%7c)&orgids=IN370) |
| [Aldehyde Degradation](http://localhost:1555/comp-genomics?type=(PWY-CLASS-DIST+%7cAldehyde-Degradation%7c)&orgids=(IN55195+I012T4+INKY1+IN366+IN370)" \t "_blank) | [0](http://localhost:1555/comp-genomics?type=(PWY-CLASS-DIST+%7cAldehyde-Degradation%7c)&orgids=IN55195) | [0](http://localhost:1555/comp-genomics?type=(PWY-CLASS-DIST+%7cAldehyde-Degradation%7c)&orgids=I012T4) | [0](http://localhost:1555/comp-genomics?type=(PWY-CLASS-DIST+%7cAldehyde-Degradation%7c)&orgids=INKY1) | [0](http://localhost:1555/comp-genomics?type=(PWY-CLASS-DIST+%7cAldehyde-Degradation%7c)&orgids=IN366) | [0](http://localhost:1555/comp-genomics?type=(PWY-CLASS-DIST+%7cAldehyde-Degradation%7c)&orgids=IN370) |
| [Amine and Polyamine Degradation](http://localhost:1555/comp-genomics?type=(PWY-CLASS-DIST+AMINE-DEG)&orgids=(IN55195+I012T4+INKY1+IN366+IN370)" \t "_blank) | [2](http://localhost:1555/comp-genomics?type=(PWY-CLASS-DIST+AMINE-DEG)&orgids=IN55195) | [2](http://localhost:1555/comp-genomics?type=(PWY-CLASS-DIST+AMINE-DEG)&orgids=I012T4) | [1](http://localhost:1555/comp-genomics?type=(PWY-CLASS-DIST+AMINE-DEG)&orgids=INKY1) | [2](http://localhost:1555/comp-genomics?type=(PWY-CLASS-DIST+AMINE-DEG)&orgids=IN366) | [2](http://localhost:1555/comp-genomics?type=(PWY-CLASS-DIST+AMINE-DEG)&orgids=IN370) |
| [Amino Acid Degradation](http://localhost:1555/comp-genomics?type=(PWY-CLASS-DIST+%7cAmino-Acid-Degradation%7c)&orgids=(IN55195+I012T4+INKY1+IN366+IN370)" \t "_blank) | [6](http://localhost:1555/comp-genomics?type=(PWY-CLASS-DIST+%7cAmino-Acid-Degradation%7c)&orgids=IN55195) | [4](http://localhost:1555/comp-genomics?type=(PWY-CLASS-DIST+%7cAmino-Acid-Degradation%7c)&orgids=I012T4) | [5](http://localhost:1555/comp-genomics?type=(PWY-CLASS-DIST+%7cAmino-Acid-Degradation%7c)&orgids=INKY1) | [6](http://localhost:1555/comp-genomics?type=(PWY-CLASS-DIST+%7cAmino-Acid-Degradation%7c)&orgids=IN366) | [5](http://localhost:1555/comp-genomics?type=(PWY-CLASS-DIST+%7cAmino-Acid-Degradation%7c)&orgids=IN370) |
| [Aromatic Compound Degradation](http://localhost:1555/comp-genomics?type=(PWY-CLASS-DIST+AROMATIC-COMPOUNDS-DEGRADATION)&orgids=(IN55195+I012T4+INKY1+IN366+IN370)" \t "_blank) | [0](http://localhost:1555/comp-genomics?type=(PWY-CLASS-DIST+AROMATIC-COMPOUNDS-DEGRADATION)&orgids=IN55195) | [0](http://localhost:1555/comp-genomics?type=(PWY-CLASS-DIST+AROMATIC-COMPOUNDS-DEGRADATION)&orgids=I012T4) | [0](http://localhost:1555/comp-genomics?type=(PWY-CLASS-DIST+AROMATIC-COMPOUNDS-DEGRADATION)&orgids=INKY1) | [0](http://localhost:1555/comp-genomics?type=(PWY-CLASS-DIST+AROMATIC-COMPOUNDS-DEGRADATION)&orgids=IN366) | [0](http://localhost:1555/comp-genomics?type=(PWY-CLASS-DIST+AROMATIC-COMPOUNDS-DEGRADATION)&orgids=IN370) |
| [C1 Compound Utilization and Assimilation](http://localhost:1555/comp-genomics?type=(PWY-CLASS-DIST+C1-COMPOUNDS)&orgids=(IN55195+I012T4+INKY1+IN366+IN370)" \t "_blank) | [1](http://localhost:1555/comp-genomics?type=(PWY-CLASS-DIST+C1-COMPOUNDS)&orgids=IN55195) | [1](http://localhost:1555/comp-genomics?type=(PWY-CLASS-DIST+C1-COMPOUNDS)&orgids=I012T4) | [1](http://localhost:1555/comp-genomics?type=(PWY-CLASS-DIST+C1-COMPOUNDS)&orgids=INKY1) | [1](http://localhost:1555/comp-genomics?type=(PWY-CLASS-DIST+C1-COMPOUNDS)&orgids=IN366) | [1](http://localhost:1555/comp-genomics?type=(PWY-CLASS-DIST+C1-COMPOUNDS)&orgids=IN370) |
| [Carbohydrate Degradation](http://localhost:1555/comp-genomics?type=(PWY-CLASS-DIST+%7cCarbohydrates-Degradation%7c)&orgids=(IN55195+I012T4+INKY1+IN366+IN370)" \t "_blank) | [5](http://localhost:1555/comp-genomics?type=(PWY-CLASS-DIST+%7cCarbohydrates-Degradation%7c)&orgids=IN55195) | [4](http://localhost:1555/comp-genomics?type=(PWY-CLASS-DIST+%7cCarbohydrates-Degradation%7c)&orgids=I012T4) | [4](http://localhost:1555/comp-genomics?type=(PWY-CLASS-DIST+%7cCarbohydrates-Degradation%7c)&orgids=INKY1) | [5](http://localhost:1555/comp-genomics?type=(PWY-CLASS-DIST+%7cCarbohydrates-Degradation%7c)&orgids=IN366) | [4](http://localhost:1555/comp-genomics?type=(PWY-CLASS-DIST+%7cCarbohydrates-Degradation%7c)&orgids=IN370) |
| [Carboxylate Degradation](http://localhost:1555/comp-genomics?type=(PWY-CLASS-DIST+CARBOXYLATES-DEG)&orgids=(IN55195+I012T4+INKY1+IN366+IN370)" \t "_blank) | [2](http://localhost:1555/comp-genomics?type=(PWY-CLASS-DIST+CARBOXYLATES-DEG)&orgids=IN55195) | [2](http://localhost:1555/comp-genomics?type=(PWY-CLASS-DIST+CARBOXYLATES-DEG)&orgids=I012T4) | [2](http://localhost:1555/comp-genomics?type=(PWY-CLASS-DIST+CARBOXYLATES-DEG)&orgids=INKY1) | [2](http://localhost:1555/comp-genomics?type=(PWY-CLASS-DIST+CARBOXYLATES-DEG)&orgids=IN366) | [2](http://localhost:1555/comp-genomics?type=(PWY-CLASS-DIST+CARBOXYLATES-DEG)&orgids=IN370) |
| [Chlorinated Compound Degradation](http://localhost:1555/comp-genomics?type=(PWY-CLASS-DIST+CHLORINATED-COMPOUNDS-DEG)&orgids=(IN55195+I012T4+INKY1+IN366+IN370)" \t "_blank) | [0](http://localhost:1555/comp-genomics?type=(PWY-CLASS-DIST+CHLORINATED-COMPOUNDS-DEG)&orgids=IN55195) | [0](http://localhost:1555/comp-genomics?type=(PWY-CLASS-DIST+CHLORINATED-COMPOUNDS-DEG)&orgids=I012T4) | [0](http://localhost:1555/comp-genomics?type=(PWY-CLASS-DIST+CHLORINATED-COMPOUNDS-DEG)&orgids=INKY1) | [0](http://localhost:1555/comp-genomics?type=(PWY-CLASS-DIST+CHLORINATED-COMPOUNDS-DEG)&orgids=IN366) | [0](http://localhost:1555/comp-genomics?type=(PWY-CLASS-DIST+CHLORINATED-COMPOUNDS-DEG)&orgids=IN370) |
| [Cofactor, Prosthetic Group, Electron Carrier Degradation](http://localhost:1555/comp-genomics?type=(PWY-CLASS-DIST+COFACTOR-DEGRADATION)&orgids=(IN55195+I012T4+INKY1+IN366+IN370)" \t "_blank) | [0](http://localhost:1555/comp-genomics?type=(PWY-CLASS-DIST+COFACTOR-DEGRADATION)&orgids=IN55195) | [0](http://localhost:1555/comp-genomics?type=(PWY-CLASS-DIST+COFACTOR-DEGRADATION)&orgids=I012T4) | [0](http://localhost:1555/comp-genomics?type=(PWY-CLASS-DIST+COFACTOR-DEGRADATION)&orgids=INKY1) | [0](http://localhost:1555/comp-genomics?type=(PWY-CLASS-DIST+COFACTOR-DEGRADATION)&orgids=IN366) | [0](http://localhost:1555/comp-genomics?type=(PWY-CLASS-DIST+COFACTOR-DEGRADATION)&orgids=IN370) |
| [Degradation/Utilization/Assimilation - Other](http://localhost:1555/comp-genomics?type=(PWY-CLASS-DIST+%7cOther-Degradation%7c)&orgids=(IN55195+I012T4+INKY1+IN366+IN370)" \t "_blank) | [0](http://localhost:1555/comp-genomics?type=(PWY-CLASS-DIST+%7cOther-Degradation%7c)&orgids=IN55195) | [0](http://localhost:1555/comp-genomics?type=(PWY-CLASS-DIST+%7cOther-Degradation%7c)&orgids=I012T4) | [0](http://localhost:1555/comp-genomics?type=(PWY-CLASS-DIST+%7cOther-Degradation%7c)&orgids=INKY1) | [0](http://localhost:1555/comp-genomics?type=(PWY-CLASS-DIST+%7cOther-Degradation%7c)&orgids=IN366) | [0](http://localhost:1555/comp-genomics?type=(PWY-CLASS-DIST+%7cOther-Degradation%7c)&orgids=IN370) |
| [Fatty Acid and Lipid Degradation](http://localhost:1555/comp-genomics?type=(PWY-CLASS-DIST+%7cFatty-Acid-and-Lipid-Degradation%7c)&orgids=(IN55195+I012T4+INKY1+IN366+IN370)" \t "_blank) | [0](http://localhost:1555/comp-genomics?type=(PWY-CLASS-DIST+%7cFatty-Acid-and-Lipid-Degradation%7c)&orgids=IN55195) | [0](http://localhost:1555/comp-genomics?type=(PWY-CLASS-DIST+%7cFatty-Acid-and-Lipid-Degradation%7c)&orgids=I012T4) | [0](http://localhost:1555/comp-genomics?type=(PWY-CLASS-DIST+%7cFatty-Acid-and-Lipid-Degradation%7c)&orgids=INKY1) | [1](http://localhost:1555/comp-genomics?type=(PWY-CLASS-DIST+%7cFatty-Acid-and-Lipid-Degradation%7c)&orgids=IN366) | [0](http://localhost:1555/comp-genomics?type=(PWY-CLASS-DIST+%7cFatty-Acid-and-Lipid-Degradation%7c)&orgids=IN370) |
| [Hormone Degradation](http://localhost:1555/comp-genomics?type=(PWY-CLASS-DIST+HORMONE-DEG)&orgids=(IN55195+I012T4+INKY1+IN366+IN370)" \t "_blank) | [0](http://localhost:1555/comp-genomics?type=(PWY-CLASS-DIST+HORMONE-DEG)&orgids=IN55195) | [0](http://localhost:1555/comp-genomics?type=(PWY-CLASS-DIST+HORMONE-DEG)&orgids=I012T4) | [0](http://localhost:1555/comp-genomics?type=(PWY-CLASS-DIST+HORMONE-DEG)&orgids=INKY1) | [0](http://localhost:1555/comp-genomics?type=(PWY-CLASS-DIST+HORMONE-DEG)&orgids=IN366) | [0](http://localhost:1555/comp-genomics?type=(PWY-CLASS-DIST+HORMONE-DEG)&orgids=IN370) |
| [Inorganic Nutrient Metabolism](http://localhost:1555/comp-genomics?type=(PWY-CLASS-DIST+%7cNoncarbon-Nutrients%7c)&orgids=(IN55195+I012T4+INKY1+IN366+IN370)" \t "_blank) | [2](http://localhost:1555/comp-genomics?type=(PWY-CLASS-DIST+%7cNoncarbon-Nutrients%7c)&orgids=IN55195) | [2](http://localhost:1555/comp-genomics?type=(PWY-CLASS-DIST+%7cNoncarbon-Nutrients%7c)&orgids=I012T4) | [2](http://localhost:1555/comp-genomics?type=(PWY-CLASS-DIST+%7cNoncarbon-Nutrients%7c)&orgids=INKY1) | [2](http://localhost:1555/comp-genomics?type=(PWY-CLASS-DIST+%7cNoncarbon-Nutrients%7c)&orgids=IN366) | [2](http://localhost:1555/comp-genomics?type=(PWY-CLASS-DIST+%7cNoncarbon-Nutrients%7c)&orgids=IN370) |
| [Nucleoside and Nucleotide Degradation](http://localhost:1555/comp-genomics?type=(PWY-CLASS-DIST+NUCLEO-DEG)&orgids=(IN55195+I012T4+INKY1+IN366+IN370)" \t "_blank) | [3](http://localhost:1555/comp-genomics?type=(PWY-CLASS-DIST+NUCLEO-DEG)&orgids=IN55195) | [3](http://localhost:1555/comp-genomics?type=(PWY-CLASS-DIST+NUCLEO-DEG)&orgids=I012T4) | [3](http://localhost:1555/comp-genomics?type=(PWY-CLASS-DIST+NUCLEO-DEG)&orgids=INKY1) | [3](http://localhost:1555/comp-genomics?type=(PWY-CLASS-DIST+NUCLEO-DEG)&orgids=IN366) | [3](http://localhost:1555/comp-genomics?type=(PWY-CLASS-DIST+NUCLEO-DEG)&orgids=IN370) |
| [Polymeric Compound Degradation](http://localhost:1555/comp-genomics?type=(PWY-CLASS-DIST+%7cPolymer-Degradation%7c)&orgids=(IN55195+I012T4+INKY1+IN366+IN370)" \t "_blank) | [0](http://localhost:1555/comp-genomics?type=(PWY-CLASS-DIST+%7cPolymer-Degradation%7c)&orgids=IN55195) | [0](http://localhost:1555/comp-genomics?type=(PWY-CLASS-DIST+%7cPolymer-Degradation%7c)&orgids=I012T4) | [0](http://localhost:1555/comp-genomics?type=(PWY-CLASS-DIST+%7cPolymer-Degradation%7c)&orgids=INKY1) | [0](http://localhost:1555/comp-genomics?type=(PWY-CLASS-DIST+%7cPolymer-Degradation%7c)&orgids=IN366) | [0](http://localhost:1555/comp-genomics?type=(PWY-CLASS-DIST+%7cPolymer-Degradation%7c)&orgids=IN370) |
| [Protein Degradation](http://localhost:1555/comp-genomics?type=(PWY-CLASS-DIST+%7cProtein-Degradation%7c)&orgids=(IN55195+I012T4+INKY1+IN366+IN370)" \t "_blank) | [0](http://localhost:1555/comp-genomics?type=(PWY-CLASS-DIST+%7cProtein-Degradation%7c)&orgids=IN55195) | [0](http://localhost:1555/comp-genomics?type=(PWY-CLASS-DIST+%7cProtein-Degradation%7c)&orgids=I012T4) | [0](http://localhost:1555/comp-genomics?type=(PWY-CLASS-DIST+%7cProtein-Degradation%7c)&orgids=INKY1) | [0](http://localhost:1555/comp-genomics?type=(PWY-CLASS-DIST+%7cProtein-Degradation%7c)&orgids=IN366) | [0](http://localhost:1555/comp-genomics?type=(PWY-CLASS-DIST+%7cProtein-Degradation%7c)&orgids=IN370) |
| [Secondary Metabolite Degradation](http://localhost:1555/comp-genomics?type=(PWY-CLASS-DIST+SECONDARY-METABOLITE-DEGRADATION)&orgids=(IN55195+I012T4+INKY1+IN366+IN370)" \t "_blank) | [2](http://localhost:1555/comp-genomics?type=(PWY-CLASS-DIST+SECONDARY-METABOLITE-DEGRADATION)&orgids=IN55195) | [1](http://localhost:1555/comp-genomics?type=(PWY-CLASS-DIST+SECONDARY-METABOLITE-DEGRADATION)&orgids=I012T4) | [1](http://localhost:1555/comp-genomics?type=(PWY-CLASS-DIST+SECONDARY-METABOLITE-DEGRADATION)&orgids=INKY1) | [2](http://localhost:1555/comp-genomics?type=(PWY-CLASS-DIST+SECONDARY-METABOLITE-DEGRADATION)&orgids=IN366) | [2](http://localhost:1555/comp-genomics?type=(PWY-CLASS-DIST+SECONDARY-METABOLITE-DEGRADATION)&orgids=IN370) |
| [Glycan Pathways](http://localhost:1555/comp-genomics?type=(PWY-CLASS-DIST+%7cGlycan-Pathways%7c)&orgids=(IN55195+I012T4+INKY1+IN366+IN370)) | [0](http://localhost:1555/comp-genomics?type=(PWY-CLASS-DIST+%7cGlycan-Pathways%7c)&orgids=IN55195) | [0](http://localhost:1555/comp-genomics?type=(PWY-CLASS-DIST+%7cGlycan-Pathways%7c)&orgids=I012T4) | [0](http://localhost:1555/comp-genomics?type=(PWY-CLASS-DIST+%7cGlycan-Pathways%7c)&orgids=INKY1) | [0](http://localhost:1555/comp-genomics?type=(PWY-CLASS-DIST+%7cGlycan-Pathways%7c)&orgids=IN366) | [0](http://localhost:1555/comp-genomics?type=(PWY-CLASS-DIST+%7cGlycan-Pathways%7c)&orgids=IN370) |
| [Signal transduction pathways](http://localhost:1555/comp-genomics?type=(PWY-CLASS-DIST+%7cSignaling-Pathways%7c)&orgids=(IN55195+I012T4+INKY1+IN366+IN370)) | [0](http://localhost:1555/comp-genomics?type=(PWY-CLASS-DIST+%7cSignaling-Pathways%7c)&orgids=IN55195) | [0](http://localhost:1555/comp-genomics?type=(PWY-CLASS-DIST+%7cSignaling-Pathways%7c)&orgids=I012T4) | [0](http://localhost:1555/comp-genomics?type=(PWY-CLASS-DIST+%7cSignaling-Pathways%7c)&orgids=INKY1) | [0](http://localhost:1555/comp-genomics?type=(PWY-CLASS-DIST+%7cSignaling-Pathways%7c)&orgids=IN366) | [0](http://localhost:1555/comp-genomics?type=(PWY-CLASS-DIST+%7cSignaling-Pathways%7c)&orgids=IN370) |
| [Total](http://localhost:1555/comp-genomics?type=(PWY-CLASS-DIST+TOTAL)&orgids=(IN55195+I012T4+INKY1+IN366+IN370)) | 114 | 110 | 109 | 117 | 106 |

**Supplemental Table 5H: Shared Pathways**

This table counts the pathways that are shared between pairs of organisms.The number in parentheses is for the pairwise pathways comparison between two organisms - the Jaccard similarity coefficient for the pathways.

Click on the first cell (Pathways Shared by Organism Pairs) to see a table listing all shared pathways.
Click on a number within a cell to see a listing of those shared pathways.

| [**Pathways Shared by Organism Pairs**](http://localhost:1555/comp-genomics?type=PATHWAY-SHARED&orgids=(IN55195+I012T4+INKY1+IN366+IN370)) | [*L.iners* ATCC 55195](http://localhost:1555/IN55195/organism-summary) | [*L.iners* I012T4](http://localhost:1555/I012T4/organism-summary) | [*L.iners* KY](http://localhost:1555/INKY1/organism-summary) | [*L.iners* pt1](http://localhost:1555/IN366/organism-summary) | [*L.iners* pt2](http://localhost:1555/IN370/organism-summary) |
| --- | --- | --- | --- | --- | --- |
| [*Lactobacillus iners* ATCC 55195](http://localhost:1555/comp-genomics?type=(PATHWAY-SHARED+IN55195)&orgids=(IN55195+I012T4+INKY1+IN366+IN370)) | [104 (1.000)](http://localhost:1555/comp-genomics?type=(PATHWAY-SHARED+IN55195)&orgids=IN55195) | [94 (0.855)](http://localhost:1555/comp-genomics?type=(PATHWAY-SHARED+IN55195)&orgids=(IN55195+I012T4)) | [94 (0.862)](http://localhost:1555/comp-genomics?type=(PATHWAY-SHARED+IN55195)&orgids=(IN55195+INKY1)) | [104 (0.972)](http://localhost:1555/comp-genomics?type=(PATHWAY-SHARED+IN55195)&orgids=(IN55195+IN366)) | [93 (0.869)](http://localhost:1555/comp-genomics?type=(PATHWAY-SHARED+IN55195)&orgids=(IN55195+IN370)) |
| [*Lactobacillus iners* I012T4](http://localhost:1555/comp-genomics?type=(PATHWAY-SHARED+I012T4)&orgids=(IN55195+I012T4+INKY1+IN366+IN370)) | [94 (0.855)](http://localhost:1555/comp-genomics?type=(PATHWAY-SHARED+I012T4)&orgids=(I012T4+IN55195)) | [100 (1.000)](http://localhost:1555/comp-genomics?type=(PATHWAY-SHARED+I012T4)&orgids=I012T4) | [95 (0.913)](http://localhost:1555/comp-genomics?type=(PATHWAY-SHARED+I012T4)&orgids=(I012T4+INKY1)) | [94 (0.832)](http://localhost:1555/comp-genomics?type=(PATHWAY-SHARED+I012T4)&orgids=(I012T4+IN366)) | [86 (0.782)](http://localhost:1555/comp-genomics?type=(PATHWAY-SHARED+I012T4)&orgids=(I012T4+IN370)) |
| [*Lactobacillus iners KY*](http://localhost:1555/comp-genomics?type=(PATHWAY-SHARED+INKY1)&orgids=(IN55195+I012T4+INKY1+IN366+IN370)) | [94 (0.862)](http://localhost:1555/comp-genomics?type=(PATHWAY-SHARED+INKY1)&orgids=(INKY1+IN55195)) | [95 (0.913)](http://localhost:1555/comp-genomics?type=(PATHWAY-SHARED+INKY1)&orgids=(INKY1+I012T4)) | [99 (1.000)](http://localhost:1555/comp-genomics?type=(PATHWAY-SHARED+INKY1)&orgids=INKY1) | [94 (0.839)](http://localhost:1555/comp-genomics?type=(PATHWAY-SHARED+INKY1)&orgids=(INKY1+IN366)) | [85 (0.773)](http://localhost:1555/comp-genomics?type=(PATHWAY-SHARED+INKY1)&orgids=(INKY1+IN370)) |
| [*Lactobacillus iners* pt1](http://localhost:1555/comp-genomics?type=(PATHWAY-SHARED+IN366)&orgids=(IN55195+I012T4+INKY1+IN366+IN370)) | [104 (0.972)](http://localhost:1555/comp-genomics?type=(PATHWAY-SHARED+IN366)&orgids=(IN366+IN55195)) | [94 (0.832)](http://localhost:1555/comp-genomics?type=(PATHWAY-SHARED+IN366)&orgids=(IN366+I012T4)) | [94 (0.839)](http://localhost:1555/comp-genomics?type=(PATHWAY-SHARED+IN366)&orgids=(IN366+INKY1)) | [107 (1.000)](http://localhost:1555/comp-genomics?type=(PATHWAY-SHARED+IN366)&orgids=IN366) | [94 (0.862)](http://localhost:1555/comp-genomics?type=(PATHWAY-SHARED+IN366)&orgids=(IN366+IN370)) |
| [*Lactobacillus iners* pt2](http://localhost:1555/comp-genomics?type=(PATHWAY-SHARED+IN370)&orgids=(IN55195+I012T4+INKY1+IN366+IN370)) | [93 (0.869)](http://localhost:1555/comp-genomics?type=(PATHWAY-SHARED+IN370)&orgids=(IN370+IN55195)) | [86 (0.782)](http://localhost:1555/comp-genomics?type=(PATHWAY-SHARED+IN370)&orgids=(IN370+I012T4)) | [85 (0.773)](http://localhost:1555/comp-genomics?type=(PATHWAY-SHARED+IN370)&orgids=(IN370+INKY1)) | [94 (0.862)](http://localhost:1555/comp-genomics?type=(PATHWAY-SHARED+IN370)&orgids=(IN370+IN366)) | [96 (1.000)](http://localhost:1555/comp-genomics?type=(PATHWAY-SHARED+IN370)&orgids=IN370) |

**Supplemental Table 5I: Unique Pathways**

| Unique Pathways in Organism: Unique Pathways | L.iners ATCC 55195 | L.iners I012T4 | L.iners KY | L.iners pt1 | L.iners pt2 |
| --- | --- | --- | --- | --- | --- |
| [glycerol degradation I](http://localhost:1555/compare-frame-in-orgs?type=NIL&object=PWY-4261&orgids=(IN55195+I012T4+INKY1+IN366+IN370)) |  |  |  | [✓](http://localhost:1555/IN366/NEW-IMAGE?type=PATHWAY&object=PWY-4261&orgids=(IN55195%20I012T4%20INKY1%20IN366%20IN370)) |  |
| [glycerol-3-phosphate to fumarate electron transfer](http://localhost:1555/compare-frame-in-orgs?type=NIL&object=PWY0-1582&orgids=(IN55195+I012T4+INKY1+IN366+IN370)) |  |  |  | [✓](http://localhost:1555/IN366/NEW-IMAGE?type=PATHWAY&object=PWY0-1582&orgids=(IN55195%20I012T4%20INKY1%20IN366%20IN370)) |  |
| [tRNA-uridine 2-thiolation and selenation (bacteria)](http://localhost:1555/compare-frame-in-orgs?type=NIL&object=PWY-7892&orgids=(IN55195+I012T4+INKY1+IN366+IN370)) |  | [✓](http://localhost:1555/I012T4/NEW-IMAGE?type=PATHWAY&object=PWY-7892&orgids=(IN55195%20I012T4%20INKY1%20IN366%20IN370)) |  |  |  |
| [Total](http://localhost:1555/comp-genomics?type=(PATHWAY-UNIQUE+UNIQUE-PATHWAYS)&orgids=(IN55195+I012T4+INKY1+IN366+IN370)) | [0](http://localhost:1555/comp-genomics?type=(PATHWAY-UNIQUE+UNIQUE-PATHWAYS)&orgids=IN55195) | [1](http://localhost:1555/comp-genomics?type=(PATHWAY-UNIQUE+UNIQUE-PATHWAYS)&orgids=I012T4) | [0](http://localhost:1555/comp-genomics?type=(PATHWAY-UNIQUE+UNIQUE-PATHWAYS)&orgids=INKY1) | [2](http://localhost:1555/comp-genomics?type=(PATHWAY-UNIQUE+UNIQUE-PATHWAYS)&orgids=IN366) | [0](http://localhost:1555/comp-genomics?type=(PATHWAY-UNIQUE+UNIQUE-PATHWAYS)&orgids=IN370) |

**Supplemental Table 5J: Pathway Holes**

A pathway hole is a reaction in a pathway for which no corresponding gene has been identified in the genome. Pathway holes may exist for a number of possible reasons: They may represent true enzymatic functions in the organism for which the gene has not yet been found, or they could represent false positive pathway predictions or cases in which the pathway in this organism differs slightly from the reference pathway in MetaCyc. This table counts all the pathway holes in each organism database, and classifies pathways based on their number of pathway holes.

| [**Pathway Holes**](http://localhost:1555/comp-genomics?type=PATHWAY-HOLES&orgids=(IN55195+I012T4+INKY1+IN366+IN370)) | [*L.iners* ATCC 55195](http://localhost:1555/IN55195/organism-summary) | [*L.iners* I012T4](http://localhost:1555/I012T4/organism-summary) | [*L.iners* KY](http://localhost:1555/INKY1/organism-summary) | [*L.iners* pt1](http://localhost:1555/IN366/organism-summary) | [*L.iners* pt2](http://localhost:1555/IN370/organism-summary) |
| --- | --- | --- | --- | --- | --- |
| [Number of Pathway Holes](http://localhost:1555/comp-genomics?type=(PATHWAY-HOLES+NUM-HOLES)&orgids=(IN55195+I012T4+INKY1+IN366+IN370)) | [98](http://localhost:1555/comp-genomics?type=(PATHWAY-HOLES+NUM-HOLES)&orgids=IN55195) | [103](http://localhost:1555/comp-genomics?type=(PATHWAY-HOLES+NUM-HOLES)&orgids=I012T4) | [93](http://localhost:1555/comp-genomics?type=(PATHWAY-HOLES+NUM-HOLES)&orgids=INKY1) | [97](http://localhost:1555/comp-genomics?type=(PATHWAY-HOLES+NUM-HOLES)&orgids=IN366) | [81](http://localhost:1555/comp-genomics?type=(PATHWAY-HOLES+NUM-HOLES)&orgids=IN370) |
| [Pathway Holes as a percentage of total reactions in pathways](http://localhost:1555/comp-genomics?type=(PATHWAY-HOLES+PERCENT-HOLES)&orgids=(IN55195+I012T4+INKY1+IN366+IN370)) | 33% | 35% | 34% | 32% | 31% |
| [Pathways with No Holes](http://localhost:1555/comp-genomics?type=(PATHWAY-HOLES+0)&orgids=(IN55195+I012T4+INKY1+IN366+IN370)) | [48](http://localhost:1555/comp-genomics?type=(PATHWAY-HOLES+0)&orgids=IN55195) | [48](http://localhost:1555/comp-genomics?type=(PATHWAY-HOLES+0)&orgids=I012T4) | [46](http://localhost:1555/comp-genomics?type=(PATHWAY-HOLES+0)&orgids=INKY1) | [51](http://localhost:1555/comp-genomics?type=(PATHWAY-HOLES+0)&orgids=IN366) | [47](http://localhost:1555/comp-genomics?type=(PATHWAY-HOLES+0)&orgids=IN370) |
| [Pathways with 1 Hole](http://localhost:1555/comp-genomics?type=(PATHWAY-HOLES+1)&orgids=(IN55195+I012T4+INKY1+IN366+IN370)) | [28](http://localhost:1555/comp-genomics?type=(PATHWAY-HOLES+1)&orgids=IN55195) | [23](http://localhost:1555/comp-genomics?type=(PATHWAY-HOLES+1)&orgids=I012T4) | [27](http://localhost:1555/comp-genomics?type=(PATHWAY-HOLES+1)&orgids=INKY1) | [29](http://localhost:1555/comp-genomics?type=(PATHWAY-HOLES+1)&orgids=IN366) | [27](http://localhost:1555/comp-genomics?type=(PATHWAY-HOLES+1)&orgids=IN370) |
| [Pathways with 2 Holes](http://localhost:1555/comp-genomics?type=(PATHWAY-HOLES+2)&orgids=(IN55195+I012T4+INKY1+IN366+IN370)) | [15](http://localhost:1555/comp-genomics?type=(PATHWAY-HOLES+2)&orgids=IN55195) | [16](http://localhost:1555/comp-genomics?type=(PATHWAY-HOLES+2)&orgids=I012T4) | [15](http://localhost:1555/comp-genomics?type=(PATHWAY-HOLES+2)&orgids=INKY1) | [14](http://localhost:1555/comp-genomics?type=(PATHWAY-HOLES+2)&orgids=IN366) | [8](http://localhost:1555/comp-genomics?type=(PATHWAY-HOLES+2)&orgids=IN370) |
| [Pathways with 3 Holes](http://localhost:1555/comp-genomics?type=(PATHWAY-HOLES+3)&orgids=(IN55195+I012T4+INKY1+IN366+IN370)) | [4](http://localhost:1555/comp-genomics?type=(PATHWAY-HOLES+3)&orgids=IN55195) | [2](http://localhost:1555/comp-genomics?type=(PATHWAY-HOLES+3)&orgids=I012T4) | [2](http://localhost:1555/comp-genomics?type=(PATHWAY-HOLES+3)&orgids=INKY1) | [4](http://localhost:1555/comp-genomics?type=(PATHWAY-HOLES+3)&orgids=IN366) | [4](http://localhost:1555/comp-genomics?type=(PATHWAY-HOLES+3)&orgids=IN370) |
| [Pathways with 4 Holes](http://localhost:1555/comp-genomics?type=(PATHWAY-HOLES+4)&orgids=(IN55195+I012T4+INKY1+IN366+IN370)) | [7](http://localhost:1555/comp-genomics?type=(PATHWAY-HOLES+4)&orgids=IN55195) | [8](http://localhost:1555/comp-genomics?type=(PATHWAY-HOLES+4)&orgids=I012T4) | [7](http://localhost:1555/comp-genomics?type=(PATHWAY-HOLES+4)&orgids=INKY1) | [7](http://localhost:1555/comp-genomics?type=(PATHWAY-HOLES+4)&orgids=IN366) | [9](http://localhost:1555/comp-genomics?type=(PATHWAY-HOLES+4)&orgids=IN370) |
| [Pathways with 5 Holes](http://localhost:1555/comp-genomics?type=(PATHWAY-HOLES+5)&orgids=(IN55195+I012T4+INKY1+IN366+IN370)) | [0](http://localhost:1555/comp-genomics?type=(PATHWAY-HOLES+5)&orgids=IN55195) | [0](http://localhost:1555/comp-genomics?type=(PATHWAY-HOLES+5)&orgids=I012T4) | [0](http://localhost:1555/comp-genomics?type=(PATHWAY-HOLES+5)&orgids=INKY1) | [0](http://localhost:1555/comp-genomics?type=(PATHWAY-HOLES+5)&orgids=IN366) | [0](http://localhost:1555/comp-genomics?type=(PATHWAY-HOLES+5)&orgids=IN370) |
| [Pathways with > 5 Holes](http://localhost:1555/comp-genomics?type=(PATHWAY-HOLES+MORE-THAN-5)&orgids=(IN55195+I012T4+INKY1+IN366+IN370)) | [2](http://localhost:1555/comp-genomics?type=(PATHWAY-HOLES+MORE-THAN-5)&orgids=IN55195) | [3](http://localhost:1555/comp-genomics?type=(PATHWAY-HOLES+MORE-THAN-5)&orgids=I012T4) | [2](http://localhost:1555/comp-genomics?type=(PATHWAY-HOLES+MORE-THAN-5)&orgids=INKY1) | [2](http://localhost:1555/comp-genomics?type=(PATHWAY-HOLES+MORE-THAN-5)&orgids=IN366) | [1](http://localhost:1555/comp-genomics?type=(PATHWAY-HOLES+MORE-THAN-5)&orgids=IN370) |
| [Total Pathways with Holes](http://localhost:1555/comp-genomics?type=(PATHWAY-HOLES+TOTAL)&orgids=(IN55195+I012T4+INKY1+IN366+IN370)) | [56](http://localhost:1555/comp-genomics?type=(PATHWAY-HOLES+TOTAL)&orgids=IN55195) | [52](http://localhost:1555/comp-genomics?type=(PATHWAY-HOLES+TOTAL)&orgids=I012T4) | [53](http://localhost:1555/comp-genomics?type=(PATHWAY-HOLES+TOTAL)&orgids=INKY1) | [56](http://localhost:1555/comp-genomics?type=(PATHWAY-HOLES+TOTAL)&orgids=IN366) | [49](http://localhost:1555/comp-genomics?type=(PATHWAY-HOLES+TOTAL)&orgids=IN370) |

**Supplemental Table 5K. Pathways involved in degradation of carbohydrate in studied *L. iners* strains.**

*L.iners* ATCC 55195 is a draft genome of *L.iners* ATCC 55195 strain isolated form a patient with bacterial vaginosis

*L.iners* I012T4 is the high quality draft genome of *L.iners* assembled from WGS sequencing data of a cervical swab of CC patient.

*L.iners* KY is the complete genome of *L.iners* isolatedfrom a healthy individual

*L.iners* pt1 and *L.iners* pt2 are draft genomes of *L.iners*  isolated from cervical swabs of 2 CC patients.

The table was generated by Pathway Tools software.

In addition to reflecting differences in biology of different organisms, these statistics reflect completeness of the PGDBs for the strains, which is lowest in *L. iners* (91% versus 97%-100% in the rest).

| **Pathway Class**: Degradation/Utilization/Assimilation - Carbohydrate Degradation | *L.iners* ATCC 55195 | *L.iners* I012T4 | *L.iners* KY | *L.iners* pt1 | *L.iners* pt2 |
| --- | --- | --- | --- | --- | --- |
| [D-galactose degradation I (Leloir pathway)](http://localhost:1555/compare-frame-in-orgs?type=PATHWAY&object=PWY-6317&orgids=(IN55195+I012T4+INKY1+IN366+IN370)) | [✓](http://localhost:1555/IN55195/NEW-IMAGE?type=PATHWAY&object=PWY-6317&orgids=(IN55195%20I012T4%20INKY1%20IN366%20IN370)) | [✓](http://localhost:1555/I012T4/NEW-IMAGE?type=PATHWAY&object=PWY-6317&orgids=(IN55195%20I012T4%20INKY1%20IN366%20IN370)) | [✓](http://localhost:1555/INKY1/NEW-IMAGE?type=PATHWAY&object=PWY-6317&orgids=(IN55195%20I012T4%20INKY1%20IN366%20IN370)) | [✓](http://localhost:1555/IN366/NEW-IMAGE?type=PATHWAY&object=PWY-6317&orgids=(IN55195%20I012T4%20INKY1%20IN366%20IN370)) | [✓](http://localhost:1555/IN370/NEW-IMAGE?type=PATHWAY&object=PWY-6317&orgids=(IN55195%20I012T4%20INKY1%20IN366%20IN370)) |
| [D-mannose degradation I](http://localhost:1555/compare-frame-in-orgs?type=PATHWAY&object=MANNCAT-PWY&orgids=(IN55195+I012T4+INKY1+IN366+IN370)) | [✓](http://localhost:1555/IN55195/NEW-IMAGE?type=PATHWAY&object=MANNCAT-PWY&orgids=(IN55195%20I012T4%20INKY1%20IN366%20IN370)) | [✓](http://localhost:1555/I012T4/NEW-IMAGE?type=PATHWAY&object=MANNCAT-PWY&orgids=(IN55195%20I012T4%20INKY1%20IN366%20IN370)) | [✓](http://localhost:1555/INKY1/NEW-IMAGE?type=PATHWAY&object=MANNCAT-PWY&orgids=(IN55195%20I012T4%20INKY1%20IN366%20IN370)) | [✓](http://localhost:1555/IN366/NEW-IMAGE?type=PATHWAY&object=MANNCAT-PWY&orgids=(IN55195%20I012T4%20INKY1%20IN366%20IN370)) | [✓](http://localhost:1555/IN370/NEW-IMAGE?type=PATHWAY&object=MANNCAT-PWY&orgids=(IN55195%20I012T4%20INKY1%20IN366%20IN370)) |
| [fructose degradation](http://localhost:1555/compare-frame-in-orgs?type=PATHWAY&object=PWY0-1314&orgids=(IN55195+I012T4+INKY1+IN366+IN370)) | [✓](http://localhost:1555/IN55195/NEW-IMAGE?type=PATHWAY&object=PWY0-1314&orgids=(IN55195%20I012T4%20INKY1%20IN366%20IN370)) | [✓](http://localhost:1555/I012T4/NEW-IMAGE?type=PATHWAY&object=PWY0-1314&orgids=(IN55195%20I012T4%20INKY1%20IN366%20IN370)) | [✓](http://localhost:1555/INKY1/NEW-IMAGE?type=PATHWAY&object=PWY0-1314&orgids=(IN55195%20I012T4%20INKY1%20IN366%20IN370)) | [✓](http://localhost:1555/IN366/NEW-IMAGE?type=PATHWAY&object=PWY0-1314&orgids=(IN55195%20I012T4%20INKY1%20IN366%20IN370)) | [✓](http://localhost:1555/IN370/NEW-IMAGE?type=PATHWAY&object=PWY0-1314&orgids=(IN55195%20I012T4%20INKY1%20IN366%20IN370)) |
| [lactose and galactose degradation I](http://localhost:1555/compare-frame-in-orgs?type=PATHWAY&object=LACTOSECAT-PWY&orgids=(IN55195+I012T4+INKY1+IN366+IN370)) | [✓](http://localhost:1555/IN55195/NEW-IMAGE?type=PATHWAY&object=LACTOSECAT-PWY&orgids=(IN55195%20I012T4%20INKY1%20IN366%20IN370)) | [✓](http://localhost:1555/I012T4/NEW-IMAGE?type=PATHWAY&object=LACTOSECAT-PWY&orgids=(IN55195%20I012T4%20INKY1%20IN366%20IN370)) |  | [✓](http://localhost:1555/IN366/NEW-IMAGE?type=PATHWAY&object=LACTOSECAT-PWY&orgids=(IN55195%20I012T4%20INKY1%20IN366%20IN370)) |  |
| [maltose degradation](http://localhost:1555/compare-frame-in-orgs?type=PATHWAY&object=MALTOSECAT-PWY&orgids=(IN55195+I012T4+INKY1+IN366+IN370)) | [✓](http://localhost:1555/IN55195/NEW-IMAGE?type=PATHWAY&object=MALTOSECAT-PWY&orgids=(IN55195%20I012T4%20INKY1%20IN366%20IN370)) |  | [✓](http://localhost:1555/INKY1/NEW-IMAGE?type=PATHWAY&object=MALTOSECAT-PWY&orgids=(IN55195%20I012T4%20INKY1%20IN366%20IN370)) | [✓](http://localhost:1555/IN366/NEW-IMAGE?type=PATHWAY&object=MALTOSECAT-PWY&orgids=(IN55195%20I012T4%20INKY1%20IN366%20IN370)) | [✓](http://localhost:1555/IN370/NEW-IMAGE?type=PATHWAY&object=MALTOSECAT-PWY&orgids=(IN55195%20I012T4%20INKY1%20IN366%20IN370)) |

**Supplemental Table 5L. Cross-Species Comparison of lactose and galactose degradation I.**

The pathway was not predicted in *L.iners* KY and *L.iners* pt2. Only 1 of 2 enzymes, which are unique for the pathway was identified in [*L. iners* ATCC 55195](http://localhost:1555/IN55195/NEW-IMAGE?type=PATHWAY&object=LACTOSECAT-PWY&orgids=(IN55195%20I012T4%20INKY1%20IN366%20IN370)) strain.

|  | [L.iners ATCC 55195](http://localhost:1555/IN55195/NEW-IMAGE?type=PATHWAY&object=LACTOSECAT-PWY&orgids=(IN55195%20I012T4%20INKY1%20IN366%20IN370)) | [L.iners I012T4](http://localhost:1555/I012T4/NEW-IMAGE?type=PATHWAY&object=LACTOSECAT-PWY&orgids=(IN55195%20I012T4%20INKY1%20IN366%20IN370)) |  | [L.iners pt1](http://localhost:1555/IN366/NEW-IMAGE?type=PATHWAY&object=LACTOSECAT-PWY&orgids=(IN55195%20I012T4%20INKY1%20IN366%20IN370)) |  |
| --- | --- | --- | --- | --- | --- |
| Pathway Evidence Glyph.  Reactions are labelled by green lines if enzyme was identified or black if not identified in the organism. Orange line labels enzymes that are iunique for the pathway | 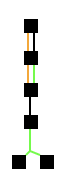 | 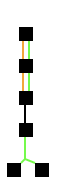 |  | 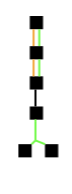 |  |
| Operons  encoding enzymes of the pathway | 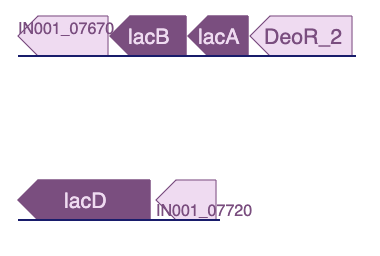 | 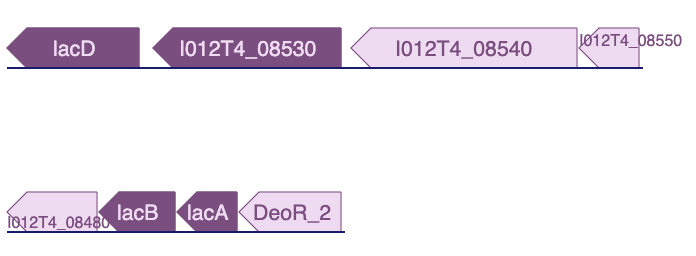 |  | 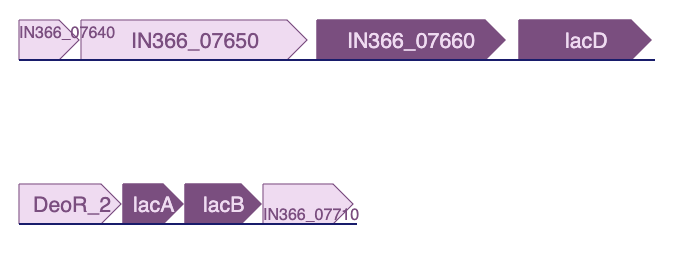 |  |
| [LACTOSE6P-HYDROXY-RXN](http://localhost:1555/META/NEW-IMAGE?type=REACTION&object=LACTOSE6P-HYDROXY-RXN&orgids=(IN55195%20I012T4%20INKY1%20IN366%20IN370)) | None | [6-phospho-beta-galactosidase](http://localhost:1555/gene?orgid=I012T4&id=I012T4_08530-MONOMER): [I012T4_08530](http://localhost:1555/gene?orgid=I012T4&id=I012T4_08530) |  | [6-phospho-beta-galactosidase](http://localhost:1555/gene?orgid=IN366&id=IN366_07660-MONOMER): [IN366_07660](http://localhost:1555/gene?orgid=IN366&id=IN366_07660) |  |
| [LACTOSE-6-PHOSPHATE-ISOMERASE-RXN](http://localhost:1555/META/NEW-IMAGE?type=REACTION&object=LACTOSE-6-PHOSPHATE-ISOMERASE-RXN&orgids=(IN55195%20I012T4%20INKY1%20IN366%20IN370)) | [galactose-6-phosphate isomerase subunit LacB](http://localhost:1555/gene?orgid=IN55195&id=IN001_07680-MONOMER): [lacB](http://localhost:1555/gene?orgid=IN55195&id=IN001_07680) [galactose-6-phosphate isomerase subunit LacA](http://localhost:1555/gene?orgid=IN55195&id=IN001_07690-MONOMER): [lacA](http://localhost:1555/gene?orgid=IN55195&id=IN001_07690) | [galactose-6-phosphate isomerase](http://localhost:1555/I012T4/NEW-IMAGE?type=ENZYME&object=CPLX1-12&orgids=(IN55195%20I012T4%20INKY1%20IN366%20IN370)): [lacB](http://localhost:1555/gene?orgid=I012T4&id=I012T4_08490), [lacA](http://localhost:1555/gene?orgid=I012T4&id=I012T4_08500) |  | [galactose-6-phosphate isomerase subunit LacB](http://localhost:1555/gene?orgid=IN366&id=IN366_07700-MONOMER): [lacB](http://localhost:1555/gene?orgid=IN366&id=IN366_07700) [galactose-6-phosphate isomerase subunit LacA](http://localhost:1555/gene?orgid=IN366&id=IN366_07690-MONOMER): [lacA](http://localhost:1555/gene?orgid=IN366&id=IN366_07690) |  |
| [EC 2.7.1.144](http://localhost:1555/META/NEW-IMAGE?type=REACTION&object=TAGAKIN-RXN&orgids=(IN55195%20I012T4%20INKY1%20IN366%20IN370)) | None | None |  | None |  |
| EC 4.1.2.40 | [tagatose-bisphosphate aldolase](http://localhost:1555/gene?orgid=IN55195&id=IN001_07710-MONOMER): [lacD](http://localhost:1555/gene?orgid=IN55195&id=IN001_07710) | [tagatose-bisphosphate aldolase](http://localhost:1555/gene?orgid=I012T4&id=I012T4_08520-MONOMER): [lacD](http://localhost:1555/gene?orgid=I012T4&id=I012T4_08520) |  | [tagatose-bisphosphate aldolase](http://localhost:1555/gene?orgid=IN366&id=IN366_07670-MONOMER): [lacD](http://localhost:1555/gene?orgid=IN366&id=IN366_07670) |  |
